# Supplementary material for: The classification of neurodegenerative disease from acoustic speech data
Source: Research Square preprint supplement (doi:10.21203/rs.3.rs-1029846/v1), 2021-11-30
Supplement: Supplementary file 1 [file 6e5e125ef5a071446e5396aa.csv]

GROUP	VARIABLE	ABS_SHAP	SHAP_RANK
FA	Min: Spectral decrease	0.15696066	1
FA	Min: f0 summed energy	0.085334512	2
FA	Min: High-frequency summed energy	0.08222592	3
FA	Min: Utterance duration (low-frequency summed energy)	0.078884558	4
FA	Max: Spectral decrease	0.060072357	5
FA	Mean: Utterance duration (broadband summed energy)	0.056205922	6
FA	Mean: Utterance duration (mid-frequency summed energy)	0.055246123	7
FA	Min: Low-frequency summed energy	0.054321959	8
FA	Mean: High-frequency summesummed energy	0.051032935	9
FA	Mean: Utterance duration (high-frequency summed energy)	0.050303732	10
FA	CoV: Inter-stress interval	0.04550029	11
FA	Range: Spectral decrease	0.045446355	12
FA	SD: Spectral crest	0.045431898	13
FA	Mean: Pause duration (mid-frequency summed energy)	0.045019771	14
FA	Min: Acoustic intensity (dB SPL)	0.044223365	15
FA	Range: Spectral crest	0.043255793	16
FA	Min: Mid-frequency summed energy	0.042848641	17
FA	CoV: Spectral crest	0.042789795	18
FA	Mean: Pause duration (f0-range summed energy)	0.038340781	19
FA	Mean: Low-frequency summed energy	0.037351882	20
FA	SD: Speech rate (mid-frequency summed energy)	0.037191751	21
FA	Min: Alpha ratio	0.035170247	22
FA	SD: Spectral entropy	0.034498063	23
FA	Mean: Utterance duration (f0-range summed energy)	0.034308279	24
FA	SD: Utterance duration (high-frequency summed energy)	0.034254329	25
FA	Min: Absolute amplitude	0.032689445	26
FA	Mean: Speech rate (high-frequency summed energy)	0.031903394	27
FA	Min: Spectral entropy	0.031150184	28
FA	Mean: Spectral decrease	0.029893642	29
FA	Max: Low-frequency summesummed energy	0.029795495	30
FA	Min: Peak broadbansummed energy	0.029546116	31
FA	Mean: Spectral centroid	0.028919026	32
FA	Max: Utterance duration (low-frequency summed energy)	0.028843527	33
FA	Max: Speech rate (mid-frequency summed energy)	0.027939307	34
FA	SD: Spectral spread	0.027699108	35
FA	CoV: Pause duration (f0-range summed energy)	0.027588437	36
FA	Mean: Speech rate (mid-frequency summed energy)	0.027537527	37
FA	SD: Utterance duration (mid-frequency summed energy)	0.026589266	38
FA	Max: Spectral spread	0.026184355	39
FA	SD: Pause duration (broadband summed energy)	0.024638822	40
FA	Max: Mid-frequency summesummed energy	0.024152709	41
FA	Min: Spectral crest	0.023805612	42
FA	Range: Low-frequency summesummed energy	0.023705662	43
FA	Min: Spectral centroid	0.023564657	44
FA	Max: Pause duration (mid-frequency summed energy)	0.022908448	45
FA	SD: Pause duration (low-frequency summed energy)	0.022521815	46
FA	Max: Spectral crest	0.022402137	47
FA	Range: Inter-stress interval	0.022075514	48
FA	CoV: Spectral kurtosis	0.021921612	49
FA	Mean: Formant 2	0.020759902	50
FA	SD: Pause duration (high-frequency summed energy)	0.020340205	51
FA	Range: Low-frequency summed energy	0.02024746	52
FA	Mean: Speech rate (f0-range summed energy)	0.020223733	53
FA	CoV: Utterance duration (Spectral flux)	0.020067862	54
FA	SD: Inter-stress interval	0.019950597	55
FA	Max: Formant 5	0.019535291	56
FA	Range: Spectral spread	0.019311647	57
FA	CoV: Spectral entropy	0.018799619	58
FA	Max: Low-frequency summed energy	0.018682906	59
FA	Max: Spectral flatness	0.01858611	60
FA	Mean: Spectral skewness	0.018577451	61
FA	CoV: Spectral skewness	0.018546371	62
FA	Range: Formant 5	0.017722648	63
FA	Min: Fundamental frequency	0.017257386	64
FA	Max: Utterance duration (f0-range summed energy)	0.017177239	65
FA	CoV: Formant 5	0.017133676	66
FA	Mean: Speech rate (low-frequency summed energy)	0.01709516	67
FA	Range: Spectral entropy	0.01656575	68
FA	SD: Speech rate (f0-range summed energy)	0.016493298	69
FA	SD: Speech rate (Absolute amplitude)	0.016405077	70
FA	Range: Speech rate (broadband summed energy)	0.016313105	71
FA	Max: Utterance duration (mid-frequency summed energy)	0.01617388	72
FA	Min: Utterance duration (f0-range summed energy)	0.0160912	73
FA	Max: Utterance duration (broadband summed energy)	0.015866008	74
FA	Range: Speech rate (high-frequency summed energy)	0.015811569	75
FA	CoV: Spectral spread	0.015803722	76
FA	Max: Pause duration (broadband summed energy)	0.015622613	77
FA	Range: Pause duration (Acoustic intensity)	0.015563752	78
FA	Max: Utterance duration (high-frequency summed energy)	0.015245303	79
FA	SD: Spectral decrease	0.015186043	80
FA	Mean: Utterance duration (Absolute amplitude)	0.015121144	81
FA	Mean: Speech rate (broadband summed energy)	0.015096341	82
FA	Mean: Spectral spread	0.015095589	83
FA	Range: Utterance duration (high-frequency summed energy)	0.014963534	84
FA	Mean: Utterance duration (Spectral flux)	0.014913029	85
FA	CoV: Spectral decrease	0.014637623	86
FA	Mean: Utterance duration (Acoustic intensity)	0.014598897	87
FA	CoV: Acoustic intensity (dB SPL)	0.014123498	88
FA	Max: Speech rate (f0-range summed energy)	0.01397093	89
FA	CoV: Formant 4	0.013783048	90
FA	SD: Utterance duration (f0-range summed energy)	0.013694777	91
FA	Range: Pause duration (mid-frequency summed energy)	0.013534612	92
FA	Max: Summed broadbansummed energy	0.013501467	93
FA	Max: Pause duration (high-frequency summed energy)	0.01347205	94
FA	Min: Summed broadbansummed energy	0.013416795	95
FA	Range: Pause duration (broadband summed energy)	0.013362057	96
FA	Range: Pause duration (f0-range summed energy)	0.013286125	97
FA	Max: f0 peak frequency	0.012833448	98
FA	Min: Mid-frequency summesummed energy	0.012785416	99
FA	Mean: Speech rate (high-frequency summed energy)	0.012684474	100
FA	Range: Speech rate (mid-frequency summed energy)	0.012404519	101
FA	Mean: Pause duration (low-frequency summed energy)	0.012375564	102
FA	Max: Formant 2	0.012345436	103
FA	Mean: Pause duration (high-frequency summed energy)	0.012284711	104
FA	CoV: Utterance duration (low-frequency summed energy)	0.01199718	105
FA	CoV: f0 summesummed energy	0.011920635	106
FA	SD: Utterance duration (low-frequency summed energy)	0.01191487	107
FA	Mean: Spectral flatness	0.011894549	108
FA	SD: Utterance duration (f0-range summed energy)	0.011821359	109
FA	Max: Spectral slope	0.011717401	110
FA	Max: Pause duration (f0-range summed energy)	0.011483093	111
FA	SD: Mid-frequency summesummed energy	0.011457314	112
FA	Max: Speech rate (f0-range summed energy)	0.011347842	113
FA	SD: Speech rate (high-frequency summed energy)	0.011339177	114
FA	SD: Pause duration (Acoustic intensity)	0.011248901	115
FA	Min: Utterance duration (low-frequency summed energy)	0.011025598	116
FA	Max: Acoustic intensity (dB SPL)	0.01071082	117
FA	CoV: Alpha ratio	0.010684692	118
FA	Range: Pause duration (broadband summed energy)	0.01064482	119
FA	Range: Spectral flatness	0.010586704	120
FA	Mean: Speech rate (Spectral flux)	0.0104912	121
FA	CoV: Pause duration (low-frequency summed energy)	0.010403516	122
FA	SD: Pause duration (mid-frequency summed energy)	0.010355374	123
FA	Max: Pause duration (f0-range summed energy)	0.010333304	124
FA	Max: Inter-stress interval	0.010315037	125
FA	Min: Spectral kurtosis	0.010278577	126
FA	SD: Formant 1	0.010256361	127
FA	Min: Utterance duration (f0-range summed energy)	0.010059849	128
FA	Range: Speech rate (low-frequency summed energy)	0.010056651	129
FA	Range: Speech rate (low-frequency summed energy)	0.009891352	130
FA	Mean: Pause duration (low-frequency summed energy)	0.009890147	131
FA	SD: Acoustic intensity (dB SPL)	0.009803454	132
FA	Min: High-frequency summesummed energy	0.009780557	133
FA	SD: Absolute amplitude	0.009368532	134
FA	Range: Pause duration (low-frequency summed energy)	0.009368233	135
FA	CoV: High-frequency summed energy	0.009292942	136
FA	Mean: Formant 5	0.009283687	137
FA	Mean: Utterance duration (low-frequency summed energy)	0.0092644	138
FA	Max: Speech rate (high-frequency summed energy)	0.009254915	139
FA	Max: Pause duration (low-frequency summed energy)	0.009225075	140
FA	Range: Spectral centroid	0.008956914	141
FA	Range: High-frequency summed energy	0.008852467	142
FA	SD: High-frequency summesummed energy	0.008697278	143
FA	Min: Low-frequency summesummed energy	0.008640026	144
FA	Min: Speech rate (Acoustic intensity)	0.008600704	145
FA	SD: Spectral flatness	0.008544261	146
FA	CoV: Utterance duration (Acoustic intensity)	0.008481412	147
FA	CoV: Spectral flux	0.008463878	148
FA	Mean: Alpha ratio	0.008364637	149
FA	Min: Pause duration (Acoustic intensity)	0.00834309	150
FA	Mean: Utterance duration (low-frequency summed energy)	0.008227537	151
FA	Mean: Speech rate (low-frequency summed energy)	0.008226125	152
FA	Mean: Pause duration (Spectral flux)	0.008175149	153
FA	CoV: High-frequency peak frequency	0.00814572	154
FA	Min: Speech rate (Absolute amplitude)	0.008124084	155
FA	Max: Formant 3	0.008113386	156
FA	Max: Formant 4	0.008079318	157
FA	SD: Pause duration (Spectral flux)	0.00804234	158
FA	Range: f0 peak frequency	0.008036867	159
FA	Range: Spectral kurtosis	0.007924049	160
FA	SD: Summed broadbansummed energy	0.007922621	161
FA	Min: Speech rate (high-frequency summed energy)	0.007872856	162
FA	Mean: Pause duration (broadband summed energy)	0.007837989	163
FA	Range: Utterance duration (broadband summed energy)	0.007819499	164
FA	Mean: Pause duration (mid-frequency summed energy)	0.007707415	165
FA	CoV: Low-frequency peak frequency	0.00769874	166
FA	Min: Speech rate (mid-frequency summed energy)	0.007612024	167
FA	Range: Summed broadbansummed energy	0.007445688	168
FA	Min: f0 summesummed energy	0.007406784	169
FA	SD: High-frequency summed energy	0.007349318	170
FA	Mean: Speech rate (broadband summed energy)	0.007295248	171
FA	SD: Speech rate (low-frequency summed energy)	0.007233735	172
FA	Mean: f0 summed energy	0.007138161	173
FA	SD: f0 peak frequency	0.007078278	174
FA	CoV: Utterance duration (f0-range summed energy)	0.007010289	175
FA	Mean: Utterance duration (high-frequency summed energy)	0.006969455	176
FA	Max: Low-frequency peak frequency	0.00690527	177
FA	CoV: High-frequency summesummed energy	0.006812478	178
FA	Min: Utterance duration (Absolute amplitude)	0.00680378	179
FA	SD: Broadband frequency peak frequency	0.006749451	180
FA	Range: Formant 3	0.006694974	181
FA	Max: Utterance duration (Acoustic intensity)	0.00669114	182
FA	Range: Formant 2	0.006611933	183
FA	SD: Utterance duration (broadband summed energy)	0.006548654	184
FA	SD: Pause duration (f0-range summed energy)	0.006496355	185
FA	CoV: f0 peak frequency	0.006488985	186
FA	Mean: Utterance duration (broadband summed energy)	0.006444641	187
FA	Mean: Pause duration (Absolute amplitude)	0.006407161	188
FA	Mean: Mid-frequency summesummed energy	0.006390328	189
FA	CoV: Speech rate (broadband summed energy)	0.006368185	190
FA	CoV: Utterance duration (high-frequency summed energy)	0.006117991	191
FA	Mean: Speech rate (Absolute amplitude)	0.006091328	192
FA	Mean: Formant 3	0.006040224	193
FA	Max: Spectral entropy	0.006007614	194
FA	CoV: Formant 2	0.006006287	195
FA	Range: Utterance duration (Spectral flux)	0.005995844	196
FA	CoV: Speech rate (Spectral flux)	0.0059394	197
FA	CoV: Speech rate (Acoustic intensity)	0.005770332	198
FA	SD: Spectral kurtosis	0.005757588	199
FA	Max: Speech rate (broadband summed energy)	0.005747852	200
FA	Range: Speech rate (f0-range summed energy)	0.005661969	201
FA	Min: Pause duration (f0-range summed energy)	0.005649372	202
FA	Mean: Speech rate (mid-frequency summed energy)	0.005547816	203
FA	Mean: Spectral entropy	0.005547248	204
FA	SD: Speech rate (Acoustic intensity)	0.005440381	205
FA	Max: Utterance duration (mid-frequency summed energy)	0.005413777	206
FA	SD: Utterance duration (low-frequency summed energy)	0.005325085	207
FA	Range: Pause duration (high-frequency summed energy)	0.005265642	208
FA	Max: f0 summed energy	0.005263038	209
FA	SD: Formant 3	0.005260494	210
FA	Mean: Formant 4	0.005253656	211
FA	Min: Pause duration (low-frequency summed energy)	0.005236502	212
FA	CoV: Pause duration (mid-frequency summed energy)	0.00515713	213
FA	Range: Peak broadbansummed energy	0.005155231	214
FA	SD: Low-frequency peak frequency	0.005138273	215
FA	Mean: Broadband frequency peak frequency	0.005066056	216
FA	Max: High-frequency summesummed energy	0.005044863	217
FA	Mean: Pause duration (broadband summed energy)	0.005025506	218
FA	Max: Speech rate (Acoustic intensity)	0.005018451	219
FA	Max: Speech rate (low-frequency summed energy)	0.005003902	220
FA	SD: Pause duration (f0-range summed energy)	0.004942308	221
FA	CoV: Speech rate (mid-frequency summed energy)	0.00493936	222
FA	SD: Alpha ratio	0.004919284	223
FA	Range: Fundamental frequency	0.004902373	224
FA	SD: Speech rate (high-frequency summed energy)	0.004894987	225
FA	Mean: Mid-frequency peak frequency	0.004892389	226
FA	CoV: Speech rate (low-frequency summed energy)	0.00487307	227
FA	Max: Spectral centroid	0.004814684	228
FA	SD: Utterance duration (broadband summed energy)	0.004777944	229
FA	CoV: Utterance duration (f0-range summed energy)	0.004768905	230
FA	SD: Speech rate (broadband summed energy)	0.004729059	231
FA	Min: Speech rate (mid-frequency summed energy)	0.004648132	232
FA	Max: Spectral kurtosis	0.004647206	233
FA	CoV: Formant 3	0.004639691	234
FA	CoV: Utterance duration (broadband summed energy)	0.004562592	235
FA	Max: Speech rate (high-frequency summed energy)	0.004557751	236
FA	Min: Pause duration (mid-frequency summed energy)	0.004525321	237
FA	Range: Utterance duration (low-frequency summed energy)	0.004463885	238
FA	Min: Utterance duration (high-frequency summed energy)	0.004463809	239
FA	SD: Formant 4	0.004450791	240
FA	Max: Speech rate (low-frequency summed energy)	0.00443598	241
FA	SD: Formant 2	0.004405043	242
FA	CoV: f0 summed energy	0.004393369	243
FA	SD: Fundamental frequency	0.004391476	244
FA	Max: Spectral flux	0.004388543	245
FA	Range: Pause duration (low-frequency summed energy)	0.004361821	246
FA	Range: Speech rate (Acoustic intensity)	0.004352264	247
FA	Max: Speech rate (broadband summed energy)	0.004268177	248
FA	SD: Pause duration (broadband summed energy)	0.00422784	249
FA	Range: Pause duration (Spectral flux)	0.004225161	250
FA	Max: Utterance duration (low-frequency summed energy)	0.004195913	251
FA	CoV: Speech rate (high-frequency summed energy)	0.004104231	252
FA	Mean: High-frequency summed energy	0.004085147	253
FA	Mean: Summed broadbansummed energy	0.004078797	254
FA	Max: Utterance duration (Absolute amplitude)	0.004060961	255
FA	Range: Speech rate (f0-range summed energy)	0.004021617	256
FA	Range: Alpha ratio	0.003998895	257
FA	Range: Mid-frequency peak frequency	0.003985442	258
FA	SD: Low-frequency summed energy	0.003851225	259
FA	Range: Utterance duration (high-frequency summed energy)	0.003830078	260
FA	CoV: Fundamental frequency	0.003821402	261
FA	Min: Spectral flatness	0.00378224	262
FA	Mean: f0 peak frequency	0.003778449	263
FA	SD: f0 summesummed energy	0.003747847	264
FA	Mean: Speech rate (f0-range summed energy)	0.003707531	265
FA	Range: Mid-frequency summesummed energy	0.003706424	266
FA	SD: Speech rate (broadband summed energy)	0.003612983	267
FA	Range: Speech rate (high-frequency summed energy)	0.003612954	268
FA	SD: Pause duration (mid-frequency summed energy)	0.003600479	269
FA	Mean: Pause duration (Acoustic intensity)	0.003579866	270
FA	Range: Utterance duration (Absolute amplitude)	0.003546504	271
FA	Max: High-frequency peak frequency	0.003507534	272
FA	Range: Spectral skewness	0.003505764	273
FA	Mean: Peak broadbansummed energy	0.003480757	274
FA	Min: Inter-stress interval	0.003452916	275
FA	SD: Mid-frequency peak frequency	0.003414627	276
FA	SD: Pause duration (Absolute amplitude)	0.003360975	277
FA	Mean: Spectral kurtosis	0.003354931	278
FA	Mean: Inter-stress interval	0.003335566	279
FA	CoV: Speech rate (f0-range summed energy)	0.003315299	280
FA	Max: Utterance duration (broadband summed energy)	0.003267004	281
FA	Min: Utterance duration (mid-frequency summed energy)	0.003242735	282
FA	Max: Spectral skewness	0.003239579	283
FA	Range: f0 summed energy	0.003214385	284
FA	Mean: Utterance duration (mid-frequency summed energy)	0.003193802	285
FA	SD: Utterance duration (mid-frequency summed energy)	0.003182736	286
FA	CoV: Utterance duration (low-frequency summed energy)	0.003124997	287
FA	Mean: Formant 1	0.003123245	288
FA	CoV: Spectral slope	0.00302481	289
FA	CoV: Pause duration (Spectral flux)	0.003015229	290
FA	Mean: Fundamental frequency	0.002969988	291
FA	Min: Utterance duration (broadband summed energy)	0.002862825	292
FA	CoV: Pause duration (f0-range summed energy)	0.002854636	293
FA	CoV: Pause duration (high-frequency summed energy)	0.002772994	294
FA	Max: Broadband frequency peak frequency	0.002766406	295
FA	SD: Utterance duration (high-frequency summed energy)	0.002695503	296
FA	Max: High-frequency summed energy	0.002667678	297
FA	CoV: Low-frequency summesummed energy	0.002589253	298
FA	Max: Fundamental frequency	0.002564511	299
FA	Min: Pause duration (f0-range summed energy)	0.002556517	300
FA	Max: Pause duration (low-frequency summed energy)	0.002545433	301
FA	Range: Speech rate (Absolute amplitude)	0.00253323	302
FA	Range: Pause duration (Absolute amplitude)	0.002532204	303
FA	SD: Pause duration (high-frequency summed energy)	0.002521706	304
FA	Min: Utterance duration (broadband summed energy)	0.002447754	305
FA	SD: High-frequency peak frequency	0.002415271	306
FA	SD: Low-frequency summesummed energy	0.00240164	307
FA	CoV: Speech rate (mid-frequency summed energy)	0.002368008	308
FA	Min: Speech rate (low-frequency summed energy)	0.00236591	309
FA	Range: Spectral slope	0.00233876	310
FA	Range: Mid-frequency summed energy	0.002284155	311
FA	Min: Utterance duration (Spectral flux)	0.002263959	312
FA	Mean: Absolute amplitude	0.002256311	313
FA	Range: Broadband frequency peak frequency	0.002239176	314
FA	Max: Pause duration (Absolute amplitude)	0.002227281	315
FA	Mean: Spectral flux	0.002211126	316
FA	Mean: Low-frequency peak frequency	0.002197225	317
FA	CoV: Broadband frequency peak frequency	0.002137482	318
FA	Mean: Utterance duration (f0-range summed energy)	0.002134298	319
FA	Max: Peak broadbansummed energy	0.002129069	320
FA	Range: f0 summesummed energy	0.002085436	321
FA	Max: Pause duration (high-frequency summed energy)	0.002075594	322
FA	Range: Speech rate (Spectral flux)	0.002036214	323
FA	CoV: Spectral flatness	0.002030199	324
FA	Max: Speech rate (mid-frequency summed energy)	0.002026086	325
FA	CoV: Mid-frequency summesummed energy	0.002012131	326
FA	Min: Speech rate (low-frequency summed energy)	0.002011048	327
FA	Max: Pause duration (mid-frequency summed energy)	0.002006408	328
FA	Range: High-frequency peak frequency	0.001956592	329
FA	CoV: Spectral centroid	0.001945157	330
FA	Mean: Low-frequency summesummed energy	0.001923129	331
FA	Range: Utterance duration (broadband summed energy)	0.001915324	332
FA	Mean: Mid-frequency summed energy	0.001847432	333
FA	SD: Speech rate (low-frequency summed energy)	0.001834306	334
FA	Range: Pause duration (high-frequency summed energy)	0.001830841	335
FA	CoV: Pause duration (broadband summed energy)	0.001825356	336
FA	Max: Formant 1	0.001777317	337
FA	CoV: Pause duration (Acoustic intensity)	0.00176994	338
FA	Min: Spectral skewness	0.001753266	339
FA	CoV: Mid-frequency peak frequency	0.001749268	340
FA	Range: Spectral flux	0.001739992	341
FA	Mean: Pause duration (high-frequency summed energy)	0.001739838	342
FA	CoV: Absolute amplitude	0.001732762	343
FA	Max: Alpha ratio	0.00173249	344
FA	SD: Speech rate (mid-frequency summed energy)	0.001725894	345
FA	Max: Utterance duration (Spectral flux)	0.001680367	346
FA	CoV: Utterance duration (mid-frequency summed energy)	0.001674941	347
FA	Min: Utterance duration (Acoustic intensity)	0.001623665	348
FA	CoV: Speech rate (f0-range summed energy)	0.001600271	349
FA	SD: Speech rate (f0-range summed energy)	0.001597583	350
FA	Range: Low-frequency peak frequency	0.001572568	351
FA	SD: Spectral slope	0.0015462	352
FA	Min: Speech rate (high-frequency summed energy)	0.001533697	353
FA	CoV: Summed broadbansummed energy	0.001531991	354
FA	Range: Absolute amplitude	0.00149689	355
FA	Mean: Pause duration (f0-range summed energy)	0.001465252	356
FA	Mean: Acoustic intensity (dB SPL)	0.001430069	357
FA	Range: High-frequency summesummed energy	0.001427222	358
FA	Max: Pause duration (broadband summed energy)	0.0014178	359
FA	Range: Formant 1	0.001399048	360
FA	Min: Speech rate (broadband summed energy)	0.001392297	361
FA	Range: Acoustic intensity (dB SPL)	0.001354035	362
FA	Mean: Speech rate (Acoustic intensity)	0.001320904	363
FA	CoV: Speech rate (high-frequency summed energy)	0.00131548	364
FA	CoV: Pause duration (Absolute amplitude)	0.001303139	365
FA	Min: Speech rate (f0-range summed energy)	0.001293091	366
FA	Min: Speech rate (f0-range summed energy)	0.001269173	367
FA	Range: Utterance duration (mid-frequency summed energy)	0.001254409	368
FA	SD: Spectral skewness	0.001214249	369
FA	Max: Pause duration (Spectral flux)	0.001193833	370
FA	Mean: Spectral crest	0.001180963	371
FA	Max: Pause duration (Acoustic intensity)	0.001133691	372
FA	Min: Speech rate (broadband summed energy)	0.001105562	373
FA	CoV: Utterance duration (broadband summed energy)	0.001088007	374
FA	Range: Utterance duration (Acoustic intensity)	0.001054594	375
FA	CoV: Utterance duration (Absolute amplitude)	0.001028929	376
FA	Range: Formant 4	0.001002113	377
FA	Range: Utterance duration (f0-range summed energy)	0.000980048	378
FA	Min: Pause duration (Absolute amplitude)	0.00097924	379
FA	CoV: Utterance duration (mid-frequency summed energy)	0.000945514	380
FA	Mean: f0 summesummed energy	0.000930398	381
FA	Max: Utterance duration (f0-range summed energy)	0.000929163	382
FA	SD: Formant 5	0.00091297	383
FA	Min: Spectral spread	0.000899705	384
FA	CoV: Speech rate (Absolute amplitude)	0.000895047	385
FA	Max: Mid-frequency peak frequency	0.000894626	386
FA	CoV: Mid-frequency summed energy	0.000887274	387
FA	Range: Pause duration (f0-range summed energy)	0.000879638	388
FA	Mean: High-frequency peak frequency	0.000873927	389
FA	Min: Pause duration (high-frequency summed energy)	0.000850887	390
FA	SD: Spectral centroid	0.00084983	391
FA	SD: Pause duration (low-frequency summed energy)	0.000756274	392
FA	CoV: Low-frequency summed energy	0.000718641	393
FA	CoV: Peak broadbansummed energy	0.000715094	394
FA	CoV: Pause duration (broadband summed energy)	0.000706755	395
FA	SD: Spectral flux	0.000696757	396
FA	Min: Pause duration (low-frequency summed energy)	0.000672301	397
FA	Min: Utterance duration (mid-frequency summed energy)	0.000655795	398
FA	SD: f0 summed energy	0.000654332	399
FA	SD: Utterance duration (Spectral flux)	0.000575786	400
FA	Min: Speech rate (Spectral flux)	0.000569998	401
FA	Range: Speech rate (mid-frequency summed energy)	0.000563473	402
FA	CoV: Pause duration (mid-frequency summed energy)	0.000552088	403
FA	Range: Utterance duration (low-frequency summed energy)	0.000535718	404
FA	Min: Pause duration (mid-frequency summed energy)	0.000535251	405
FA	CoV: Pause duration (low-frequency summed energy)	0.000518935	406
FA	Max: f0 summesummed energy	0.000488355	407
FA	CoV: Formant 1	0.000442403	408
FA	Min: Utterance duration (high-frequency summed energy)	0.000440929	409
FA	CoV: Speech rate (low-frequency summed energy)	0.000413212	410
FA	SD: Speech rate (Spectral flux)	0.000362911	411
FA	Max: Absolute amplitude	0.000321038	412
FA	SD: Utterance duration (Acoustic intensity)	0.000303488	413
FA	SD: Mid-frequency summed energy	0.000293224	414
FA	Min: Pause duration (broadband summed energy)	0.000277308	415
FA	CoV: Utterance duration (high-frequency summed energy)	0.000262039	416
FA	Min: Spectral slope	0.000240781	417
FA	Max: Mid-frequency summed energy	0.000240479	418
FA	Min: Pause duration (broadband summed energy)	0.000222847	419
FA	Range: Utterance duration (f0-range summed energy)	0.00021344	420
FA	Max: Speech rate (Spectral flux)	0.000180496	421
FA	Min: Pause duration (high-frequency summed energy)	0.00017829	422
FA	Min: Pause duration (Spectral flux)	8.79331E-05	423
FA	CoV: Pause duration (high-frequency summed energy)	4.62245E-05	424
FA	Max: Speech rate (Absolute amplitude)	0	425
FA	SD: Utterance duration (Absolute amplitude)	0	426
FA	CoV: Speech rate (broadband summed energy)	0	427
FA	Max: Utterance duration (high-frequency summed energy)	0	428
FA	Range: Pause duration (mid-frequency summed energy)	0	429
FA	Range: Speech rate (broadband summed energy)	0	430
FA	Range: Utterance duration (mid-frequency summed energy)	0	431
FA	Mean: Spectral slope	0	432
FA	Min: Spectral flux	0	433
FA	Min: Formant 5	0	434
FA	Min: Formant 4	0	435
FA	Min: Formant 3	0	436
FA	Min: Formant 2	0	437
FA	Min: Formant 1	0	438
FA	Min: Broadband frequency peak frequency	0	439
FA	Min: f0 peak frequency	0	440
FA	Min: High-frequency peak frequency	0	441
FA	Min: Mid-frequency peak frequency	0	442
FA	Min: Low-frequency peak frequency	0	443
FA	SD: Peak broadbansummed energy	0	444
HC	Min: Spectral decrease	0.437859575	1
HC	Min: f0 summed energy	0.026311523	2
HC	Min: High-frequency summed energy	0.05796701	3
HC	Min: Utterance duration (low-frequency summed energy)	0.012418211	4
HC	Max: Spectral decrease	0.034485653	5
HC	Mean: Utterance duration (broadband summed energy)	0.039200367	6
HC	Mean: Utterance duration (mid-frequency summed energy)	0.033998916	7
HC	Min: Low-frequency summed energy	0.102628362	8
HC	Mean: High-frequency summesummed energy	0.01675944	9
HC	Mean: Utterance duration (high-frequency summed energy)	0.032695207	10
HC	CoV: Inter-stress interval	0.018629683	11
HC	Range: Spectral decrease	0.204417036	12
HC	SD: Spectral crest	0.057865025	13
HC	Mean: Pause duration (mid-frequency summed energy)	0.027923598	14
HC	Min: Acoustic intensity (dB SPL)	0.058995258	15
HC	Range: Spectral crest	0.027442895	16
HC	Min: Mid-frequency summed energy	0.019438023	17
HC	CoV: Spectral crest	0.04429034	18
HC	Mean: Pause duration (f0-range summed energy)	0.028736467	19
HC	Mean: Low-frequency summed energy	0.012589754	20
HC	SD: Speech rate (mid-frequency summed energy)	0.041005102	21
HC	Min: Alpha ratio	0.04975014	22
HC	SD: Spectral entropy	0.042656676	23
HC	Mean: Utterance duration (f0-range summed energy)	0.036162375	24
HC	SD: Utterance duration (high-frequency summed energy)	0.031699371	25
HC	Min: Absolute amplitude	0.009139206	26
HC	Mean: Speech rate (high-frequency summed energy)	0.021831347	27
HC	Min: Spectral entropy	0.029195273	28
HC	Mean: Spectral decrease	0.27084047	29
HC	Max: Low-frequency summesummed energy	0.024048365	30
HC	Min: Peak broadbansummed energy	0.079424752	31
HC	Mean: Spectral centroid	0.03066482	32
HC	Max: Utterance duration (low-frequency summed energy)	0.030860507	33
HC	Max: Speech rate (mid-frequency summed energy)	0.037391917	34
HC	SD: Spectral spread	0.020478999	35
HC	CoV: Pause duration (f0-range summed energy)	0.033754583	36
HC	Mean: Speech rate (mid-frequency summed energy)	0.032855368	37
HC	SD: Utterance duration (mid-frequency summed energy)	0.027779633	38
HC	Max: Spectral spread	0.116875422	39
HC	SD: Pause duration (broadband summed energy)	0.031231054	40
HC	Max: Mid-frequency summesummed energy	0.010330543	41
HC	Min: Spectral crest	0.016388882	42
HC	Range: Low-frequency summesummed energy	0.134648491	43
HC	Min: Spectral centroid	0.045814621	44
HC	Max: Pause duration (mid-frequency summed energy)	0.023372547	45
HC	SD: Pause duration (low-frequency summed energy)	0.018369922	46
HC	Max: Spectral crest	0.019704996	47
HC	Range: Inter-stress interval	0.031499251	48
HC	CoV: Spectral kurtosis	0.032589579	49
HC	Mean: Formant 2	0.029816751	50
HC	SD: Pause duration (high-frequency summed energy)	0.010315392	51
HC	Range: Low-frequency summed energy	0.006914346	52
HC	Mean: Speech rate (f0-range summed energy)	0.012952004	53
HC	CoV: Utterance duration (Spectral flux)	0.020101458	54
HC	SD: Inter-stress interval	0.011190806	55
HC	Max: Formant 5	0.007935794	56
HC	Range: Spectral spread	0.070974325	57
HC	CoV: Spectral entropy	0.019907948	58
HC	Max: Low-frequency summed energy	0.009889163	59
HC	Max: Spectral flatness	0.029717411	60
HC	Mean: Spectral skewness	0.013138947	61
HC	CoV: Spectral skewness	0.010409801	62
HC	Range: Formant 5	0.008156816	63
HC	Min: Fundamental frequency	0.008597794	64
HC	Max: Utterance duration (f0-range summed energy)	0.023499382	65
HC	CoV: Formant 5	0.022153312	66
HC	Mean: Speech rate (low-frequency summed energy)	0.005364287	67
HC	Range: Spectral entropy	0.007491838	68
HC	SD: Speech rate (f0-range summed energy)	0.013277786	69
HC	SD: Speech rate (Absolute amplitude)	0.01394241	70
HC	Range: Speech rate (broadband summed energy)	0.025341449	71
HC	Max: Utterance duration (mid-frequency summed energy)	0.017201772	72
HC	Min: Utterance duration (f0-range summed energy)	0.015865024	73
HC	Max: Utterance duration (broadband summed energy)	0.018764075	74
HC	Range: Speech rate (high-frequency summed energy)	0.014673525	75
HC	CoV: Spectral spread	0.0040639	76
HC	Max: Pause duration (broadband summed energy)	0.02331165	77
HC	Range: Pause duration (Acoustic intensity)	0.024505139	78
HC	Max: Utterance duration (high-frequency summed energy)	0.014492338	79
HC	SD: Spectral decrease	0.111982674	80
HC	Mean: Utterance duration (Absolute amplitude)	0.023187582	81
HC	Mean: Speech rate (broadband summed energy)	0.010894018	82
HC	Mean: Spectral spread	0.031805323	83
HC	Range: Utterance duration (high-frequency summed energy)	0.01786705	84
HC	Mean: Utterance duration (Spectral flux)	0.008285107	85
HC	CoV: Spectral decrease	0.060054189	86
HC	Mean: Utterance duration (Acoustic intensity)	0.021435735	87
HC	CoV: Acoustic intensity (dB SPL)	0.020221966	88
HC	Max: Speech rate (f0-range summed energy)	0.024301616	89
HC	CoV: Formant 4	0.017393858	90
HC	SD: Utterance duration (f0-range summed energy)	0.011255555	91
HC	Range: Pause duration (mid-frequency summed energy)	0.018038895	92
HC	Max: Summed broadbansummed energy	0.006338481	93
HC	Max: Pause duration (high-frequency summed energy)	0.009751279	94
HC	Min: Summed broadbansummed energy	0.039202955	95
HC	Range: Pause duration (broadband summed energy)	0.018925575	96
HC	Range: Pause duration (f0-range summed energy)	0.02007505	97
HC	Max: f0 peak frequency	0.011233946	98
HC	Min: Mid-frequency summesummed energy	0.00840105	99
HC	Mean: Speech rate (high-frequency summed energy)	0.011239354	100
HC	Range: Speech rate (mid-frequency summed energy)	0.034976966	101
HC	Mean: Pause duration (low-frequency summed energy)	0.016248995	102
HC	Max: Formant 2	0.044662309	103
HC	Mean: Pause duration (high-frequency summed energy)	0.005084303	104
HC	CoV: Utterance duration (low-frequency summed energy)	0.018322116	105
HC	CoV: f0 summesummed energy	0.032523895	106
HC	SD: Utterance duration (low-frequency summed energy)	0.012091443	107
HC	Mean: Spectral flatness	0.00491993	108
HC	SD: Utterance duration (f0-range summed energy)	0.012015563	109
HC	Max: Spectral slope	0.048522489	110
HC	Max: Pause duration (f0-range summed energy)	0.01868625	111
HC	SD: Mid-frequency summesummed energy	0.006124446	112
HC	Max: Speech rate (f0-range summed energy)	0.008107928	113
HC	SD: Speech rate (high-frequency summed energy)	0.031417986	114
HC	SD: Pause duration (Acoustic intensity)	0.010793929	115
HC	Min: Utterance duration (low-frequency summed energy)	0.009106291	116
HC	Max: Acoustic intensity (dB SPL)	0.004236576	117
HC	CoV: Alpha ratio	0.004788929	118
HC	Range: Pause duration (broadband summed energy)	0.014638956	119
HC	Range: Spectral flatness	0.013868061	120
HC	Mean: Speech rate (Spectral flux)	0.008182121	121
HC	CoV: Pause duration (low-frequency summed energy)	0.009701763	122
HC	SD: Pause duration (mid-frequency summed energy)	0.012030719	123
HC	Max: Pause duration (f0-range summed energy)	0.020855894	124
HC	Max: Inter-stress interval	0.013004048	125
HC	Min: Spectral kurtosis	0.005767917	126
HC	SD: Formant 1	0.020633515	127
HC	Min: Utterance duration (f0-range summed energy)	0.008245608	128
HC	Range: Speech rate (low-frequency summed energy)	0.013243804	129
HC	Range: Speech rate (low-frequency summed energy)	0.004971405	130
HC	Mean: Pause duration (low-frequency summed energy)	0.009389437	131
HC	SD: Acoustic intensity (dB SPL)	0.011664768	132
HC	Min: High-frequency summesummed energy	0.037173949	133
HC	SD: Absolute amplitude	0.003938406	134
HC	Range: Pause duration (low-frequency summed energy)	0.007542947	135
HC	CoV: High-frequency summed energy	0.006169987	136
HC	Mean: Formant 5	0.012746639	137
HC	Mean: Utterance duration (low-frequency summed energy)	0.008212977	138
HC	Max: Speech rate (high-frequency summed energy)	0.007040439	139
HC	Max: Pause duration (low-frequency summed energy)	0.014043458	140
HC	Range: Spectral centroid	0.045927892	141
HC	Range: High-frequency summed energy	0.010770315	142
HC	SD: High-frequency summesummed energy	0.005060651	143
HC	Min: Low-frequency summesummed energy	0.02799533	144
HC	Min: Speech rate (Acoustic intensity)	0.006241376	145
HC	SD: Spectral flatness	0.006342139	146
HC	CoV: Utterance duration (Acoustic intensity)	0.009476985	147
HC	CoV: Spectral flux	0.030462226	148
HC	Mean: Alpha ratio	0.013265096	149
HC	Min: Pause duration (Acoustic intensity)	0.003849695	150
HC	Mean: Utterance duration (low-frequency summed energy)	0.008128797	151
HC	Mean: Speech rate (low-frequency summed energy)	0.007774513	152
HC	Mean: Pause duration (Spectral flux)	0.011081947	153
HC	CoV: High-frequency peak frequency	0.01428462	154
HC	Min: Speech rate (Absolute amplitude)	0.00529887	155
HC	Max: Formant 3	0.012967881	156
HC	Max: Formant 4	0.008471555	157
HC	SD: Pause duration (Spectral flux)	0.009055403	158
HC	Range: f0 peak frequency	0.008379308	159
HC	Range: Spectral kurtosis	0.002434314	160
HC	SD: Summed broadbansummed energy	0.003882093	161
HC	Min: Speech rate (high-frequency summed energy)	0.005515993	162
HC	Mean: Pause duration (broadband summed energy)	0.013691738	163
HC	Range: Utterance duration (broadband summed energy)	0.005876462	164
HC	Mean: Pause duration (mid-frequency summed energy)	0.006251419	165
HC	CoV: Low-frequency peak frequency	0.02709802	166
HC	Min: Speech rate (mid-frequency summed energy)	0.005326085	167
HC	Range: Summed broadbansummed energy	0.004711668	168
HC	Min: f0 summesummed energy	0.005174657	169
HC	SD: High-frequency summed energy	0.004372373	170
HC	Mean: Speech rate (broadband summed energy)	0.015534745	171
HC	SD: Speech rate (low-frequency summed energy)	0.009320074	172
HC	Mean: f0 summed energy	0.006264956	173
HC	SD: f0 peak frequency	0.004857497	174
HC	CoV: Utterance duration (f0-range summed energy)	0.005213669	175
HC	Mean: Utterance duration (high-frequency summed energy)	0.006353766	176
HC	Max: Low-frequency peak frequency	0.020608342	177
HC	CoV: High-frequency summesummed energy	0.003546566	178
HC	Min: Utterance duration (Absolute amplitude)	0.003217232	179
HC	SD: Broadband frequency peak frequency	0.005467301	180
HC	Range: Formant 3	0.01181388	181
HC	Max: Utterance duration (Acoustic intensity)	0.00577653	182
HC	Range: Formant 2	0.016019914	183
HC	SD: Utterance duration (broadband summed energy)	0.003080767	184
HC	SD: Pause duration (f0-range summed energy)	0.005208053	185
HC	CoV: f0 peak frequency	0.013273975	186
HC	Mean: Utterance duration (broadband summed energy)	0.011147108	187
HC	Mean: Pause duration (Absolute amplitude)	0.006123344	188
HC	Mean: Mid-frequency summesummed energy	0.007776255	189
HC	CoV: Speech rate (broadband summed energy)	0.005480248	190
HC	CoV: Utterance duration (high-frequency summed energy)	0.005747606	191
HC	Mean: Speech rate (Absolute amplitude)	0.010334852	192
HC	Mean: Formant 3	0.008709625	193
HC	Max: Spectral entropy	0.004527458	194
HC	CoV: Formant 2	0.010772934	195
HC	Range: Utterance duration (Spectral flux)	0.006288893	196
HC	CoV: Speech rate (Spectral flux)	0.005267399	197
HC	CoV: Speech rate (Acoustic intensity)	0.003383973	198
HC	SD: Spectral kurtosis	0.002205173	199
HC	Max: Speech rate (broadband summed energy)	0.00816552	200
HC	Range: Speech rate (f0-range summed energy)	0.011005292	201
HC	Min: Pause duration (f0-range summed energy)	0.003404851	202
HC	Mean: Speech rate (mid-frequency summed energy)	0.003400705	203
HC	Mean: Spectral entropy	0.007518691	204
HC	SD: Speech rate (Acoustic intensity)	0.003599458	205
HC	Max: Utterance duration (mid-frequency summed energy)	0.005067903	206
HC	SD: Utterance duration (low-frequency summed energy)	0.004206591	207
HC	Range: Pause duration (high-frequency summed energy)	0.004375836	208
HC	Max: f0 summed energy	0.00253339	209
HC	SD: Formant 3	0.006077731	210
HC	Mean: Formant 4	0.008548067	211
HC	Min: Pause duration (low-frequency summed energy)	0.003301577	212
HC	CoV: Pause duration (mid-frequency summed energy)	0.006339086	213
HC	Range: Peak broadbansummed energy	0.003685431	214
HC	SD: Low-frequency peak frequency	0.033234867	215
HC	Mean: Broadband frequency peak frequency	0.00476568	216
HC	Max: High-frequency summesummed energy	0.003964196	217
HC	Mean: Pause duration (broadband summed energy)	0.003232055	218
HC	Max: Speech rate (Acoustic intensity)	0.00751627	219
HC	Max: Speech rate (low-frequency summed energy)	0.004777252	220
HC	SD: Pause duration (f0-range summed energy)	0.004142024	221
HC	CoV: Speech rate (mid-frequency summed energy)	0.007589867	222
HC	SD: Alpha ratio	0.007428025	223
HC	Range: Fundamental frequency	0.005011669	224
HC	SD: Speech rate (high-frequency summed energy)	0.004533616	225
HC	Mean: Mid-frequency peak frequency	0.006592662	226
HC	CoV: Speech rate (low-frequency summed energy)	0.002644088	227
HC	Max: Spectral centroid	0.013757867	228
HC	SD: Utterance duration (broadband summed energy)	0.003859984	229
HC	CoV: Utterance duration (f0-range summed energy)	0.004551882	230
HC	SD: Speech rate (broadband summed energy)	0.005864445	231
HC	Min: Speech rate (mid-frequency summed energy)	0.003812025	232
HC	Max: Spectral kurtosis	0.005528055	233
HC	CoV: Formant 3	0.007361687	234
HC	CoV: Utterance duration (broadband summed energy)	0.003024773	235
HC	Max: Speech rate (high-frequency summed energy)	0.007657246	236
HC	Min: Pause duration (mid-frequency summed energy)	0.002684132	237
HC	Range: Utterance duration (low-frequency summed energy)	0.007539931	238
HC	Min: Utterance duration (high-frequency summed energy)	0.006713591	239
HC	SD: Formant 4	0.020545719	240
HC	Max: Speech rate (low-frequency summed energy)	0.007696358	241
HC	SD: Formant 2	0.022400541	242
HC	CoV: f0 summed energy	0.007930208	243
HC	SD: Fundamental frequency	0.007465182	244
HC	Max: Spectral flux	0.006168237	245
HC	Range: Pause duration (low-frequency summed energy)	0.003751985	246
HC	Range: Speech rate (Acoustic intensity)	0.004726506	247
HC	Max: Speech rate (broadband summed energy)	0.006871918	248
HC	SD: Pause duration (broadband summed energy)	0.004675384	249
HC	Range: Pause duration (Spectral flux)	0.008670929	250
HC	Max: Utterance duration (low-frequency summed energy)	0.005457411	251
HC	CoV: Speech rate (high-frequency summed energy)	0.004788736	252
HC	Mean: High-frequency summed energy	0.004567127	253
HC	Mean: Summed broadbansummed energy	0.010579818	254
HC	Max: Utterance duration (Absolute amplitude)	0.003870239	255
HC	Range: Speech rate (f0-range summed energy)	0.009242276	256
HC	Range: Alpha ratio	0.00291242	257
HC	Range: Mid-frequency peak frequency	0.009641945	258
HC	SD: Low-frequency summed energy	0.001844687	259
HC	Range: Utterance duration (high-frequency summed energy)	0.001839356	260
HC	CoV: Fundamental frequency	0.006883612	261
HC	Min: Spectral flatness	0.002444063	262
HC	Mean: f0 peak frequency	0.004540486	263
HC	SD: f0 summesummed energy	0.003314803	264
HC	Mean: Speech rate (f0-range summed energy)	0.008817073	265
HC	Range: Mid-frequency summesummed energy	0.004788432	266
HC	SD: Speech rate (broadband summed energy)	0.003649122	267
HC	Range: Speech rate (high-frequency summed energy)	0.004325744	268
HC	SD: Pause duration (mid-frequency summed energy)	0.003215487	269
HC	Mean: Pause duration (Acoustic intensity)	0.017728226	270
HC	Range: Utterance duration (Absolute amplitude)	0.003066613	271
HC	Max: High-frequency peak frequency	0.001907082	272
HC	Range: Spectral skewness	0.002923416	273
HC	Mean: Peak broadbansummed energy	0.003224744	274
HC	Min: Inter-stress interval	0.004484519	275
HC	SD: Mid-frequency peak frequency	0.001788188	276
HC	SD: Pause duration (Absolute amplitude)	0.0061312	277
HC	Mean: Spectral kurtosis	0.005298644	278
HC	Mean: Inter-stress interval	0.0057909	279
HC	CoV: Speech rate (f0-range summed energy)	0.002970478	280
HC	Max: Utterance duration (broadband summed energy)	0.002632435	281
HC	Min: Utterance duration (mid-frequency summed energy)	0.008026023	282
HC	Max: Spectral skewness	0.004157646	283
HC	Range: f0 summed energy	0.001905386	284
HC	Mean: Utterance duration (mid-frequency summed energy)	0.003264951	285
HC	SD: Utterance duration (mid-frequency summed energy)	0.009584696	286
HC	CoV: Utterance duration (low-frequency summed energy)	0.002665415	287
HC	Mean: Formant 1	0.004018496	288
HC	CoV: Spectral slope	0.025881285	289
HC	CoV: Pause duration (Spectral flux)	0.00469219	290
HC	Mean: Fundamental frequency	0.0035749	291
HC	Min: Utterance duration (broadband summed energy)	0.003142328	292
HC	CoV: Pause duration (f0-range summed energy)	0.001701052	293
HC	CoV: Pause duration (high-frequency summed energy)	0.00136089	294
HC	Max: Broadband frequency peak frequency	0.006254956	295
HC	SD: Utterance duration (high-frequency summed energy)	0.008654331	296
HC	Max: High-frequency summed energy	0.005486058	297
HC	CoV: Low-frequency summesummed energy	0.011420451	298
HC	Max: Fundamental frequency	0.004950601	299
HC	Min: Pause duration (f0-range summed energy)	0.002247503	300
HC	Max: Pause duration (low-frequency summed energy)	0.003221589	301
HC	Range: Speech rate (Absolute amplitude)	0.002016453	302
HC	Range: Pause duration (Absolute amplitude)	0.007084692	303
HC	SD: Pause duration (high-frequency summed energy)	0.003467666	304
HC	Min: Utterance duration (broadband summed energy)	0.001992864	305
HC	SD: High-frequency peak frequency	0.002144775	306
HC	SD: Low-frequency summesummed energy	0.006307013	307
HC	CoV: Speech rate (mid-frequency summed energy)	0.002802841	308
HC	Min: Speech rate (low-frequency summed energy)	0.004469742	309
HC	Range: Spectral slope	0.00366937	310
HC	Range: Mid-frequency summed energy	0.003263618	311
HC	Min: Utterance duration (Spectral flux)	0.003725551	312
HC	Mean: Absolute amplitude	0.007936832	313
HC	Range: Broadband frequency peak frequency	0.004507715	314
HC	Max: Pause duration (Absolute amplitude)	0.002899964	315
HC	Mean: Spectral flux	0.00277077	316
HC	Mean: Low-frequency peak frequency	0.005827322	317
HC	CoV: Broadband frequency peak frequency	0.003290041	318
HC	Mean: Utterance duration (f0-range summed energy)	0.002300848	319
HC	Max: Peak broadbansummed energy	0.000783714	320
HC	Range: f0 summesummed energy	0.002544564	321
HC	Max: Pause duration (high-frequency summed energy)	0.001742147	322
HC	Range: Speech rate (Spectral flux)	0.001407988	323
HC	CoV: Spectral flatness	0.003363714	324
HC	Max: Speech rate (mid-frequency summed energy)	0.001898969	325
HC	CoV: Mid-frequency summesummed energy	0.003921241	326
HC	Min: Speech rate (low-frequency summed energy)	0.002717616	327
HC	Max: Pause duration (mid-frequency summed energy)	0.001386329	328
HC	Range: High-frequency peak frequency	0.001335639	329
HC	CoV: Spectral centroid	0.003877209	330
HC	Mean: Low-frequency summesummed energy	0.013010114	331
HC	Range: Utterance duration (broadband summed energy)	0.001506105	332
HC	Mean: Mid-frequency summed energy	0.003571396	333
HC	SD: Speech rate (low-frequency summed energy)	0.000952497	334
HC	Range: Pause duration (high-frequency summed energy)	0.002229897	335
HC	CoV: Pause duration (broadband summed energy)	0.003380307	336
HC	Max: Formant 1	0.005588492	337
HC	CoV: Pause duration (Acoustic intensity)	0.00084897	338
HC	Min: Spectral skewness	0.006157965	339
HC	CoV: Mid-frequency peak frequency	0.001510634	340
HC	Range: Spectral flux	0.003230314	341
HC	Mean: Pause duration (high-frequency summed energy)	0.002456228	342
HC	CoV: Absolute amplitude	0.002679557	343
HC	Max: Alpha ratio	0.001318201	344
HC	SD: Speech rate (mid-frequency summed energy)	0.001992982	345
HC	Max: Utterance duration (Spectral flux)	0.006494222	346
HC	CoV: Utterance duration (mid-frequency summed energy)	0.000786066	347
HC	Min: Utterance duration (Acoustic intensity)	0.001980365	348
HC	CoV: Speech rate (f0-range summed energy)	0.002853569	349
HC	SD: Speech rate (f0-range summed energy)	0.002083678	350
HC	Range: Low-frequency peak frequency	0.007712712	351
HC	SD: Spectral slope	0.001966871	352
HC	Min: Speech rate (high-frequency summed energy)	0.004685315	353
HC	CoV: Summed broadbansummed energy	0.002945525	354
HC	Range: Absolute amplitude	0.002003372	355
HC	Mean: Pause duration (f0-range summed energy)	0.00231648	356
HC	Mean: Acoustic intensity (dB SPL)	0.006680282	357
HC	Range: High-frequency summesummed energy	0.001725445	358
HC	Max: Pause duration (broadband summed energy)	0.00171155	359
HC	Range: Formant 1	0.00194958	360
HC	Min: Speech rate (broadband summed energy)	0.003300966	361
HC	Range: Acoustic intensity (dB SPL)	0.001406362	362
HC	Mean: Speech rate (Acoustic intensity)	0.008636907	363
HC	CoV: Speech rate (high-frequency summed energy)	0.001269081	364
HC	CoV: Pause duration (Absolute amplitude)	0.001149768	365
HC	Min: Speech rate (f0-range summed energy)	0.004323467	366
HC	Min: Speech rate (f0-range summed energy)	0.003665003	367
HC	Range: Utterance duration (mid-frequency summed energy)	0.002530848	368
HC	SD: Spectral skewness	0.002150015	369
HC	Max: Pause duration (Spectral flux)	0.001354324	370
HC	Mean: Spectral crest	0.00249963	371
HC	Max: Pause duration (Acoustic intensity)	0.002014185	372
HC	Min: Speech rate (broadband summed energy)	0.000786246	373
HC	CoV: Utterance duration (broadband summed energy)	0.000871383	374
HC	Range: Utterance duration (Acoustic intensity)	0.002164391	375
HC	CoV: Utterance duration (Absolute amplitude)	0.000536936	376
HC	Range: Formant 4	0.00059498	377
HC	Range: Utterance duration (f0-range summed energy)	0.001876382	378
HC	Min: Pause duration (Absolute amplitude)	0.001776242	379
HC	CoV: Utterance duration (mid-frequency summed energy)	0.000829818	380
HC	Mean: f0 summesummed energy	0.000886301	381
HC	Max: Utterance duration (f0-range summed energy)	0.002010275	382
HC	SD: Formant 5	0.000862655	383
HC	Min: Spectral spread	0.000708147	384
HC	CoV: Speech rate (Absolute amplitude)	0.000511852	385
HC	Max: Mid-frequency peak frequency	0.001533005	386
HC	CoV: Mid-frequency summed energy	0.001177102	387
HC	Range: Pause duration (f0-range summed energy)	0.000787824	388
HC	Mean: High-frequency peak frequency	0.001272276	389
HC	Min: Pause duration (high-frequency summed energy)	0.000782772	390
HC	SD: Spectral centroid	0.002431692	391
HC	SD: Pause duration (low-frequency summed energy)	0.001310759	392
HC	CoV: Low-frequency summed energy	0.00163467	393
HC	CoV: Peak broadbansummed energy	0.00110702	394
HC	CoV: Pause duration (broadband summed energy)	0.001480978	395
HC	SD: Spectral flux	0.001010308	396
HC	Min: Pause duration (low-frequency summed energy)	0.000738814	397
HC	Min: Utterance duration (mid-frequency summed energy)	0.001888658	398
HC	SD: f0 summed energy	0.000665219	399
HC	SD: Utterance duration (Spectral flux)	0.000647143	400
HC	Min: Speech rate (Spectral flux)	0.000349731	401
HC	Range: Speech rate (mid-frequency summed energy)	0.000732876	402
HC	CoV: Pause duration (mid-frequency summed energy)	0.000330589	403
HC	Range: Utterance duration (low-frequency summed energy)	0.000716768	404
HC	Min: Pause duration (mid-frequency summed energy)	0.001003286	405
HC	CoV: Pause duration (low-frequency summed energy)	0.000481371	406
HC	Max: f0 summesummed energy	0.001012285	407
HC	CoV: Formant 1	0.000894468	408
HC	Min: Utterance duration (high-frequency summed energy)	0.000568735	409
HC	CoV: Speech rate (low-frequency summed energy)	0.000478472	410
HC	SD: Speech rate (Spectral flux)	0.000807606	411
HC	Max: Absolute amplitude	0.000584991	412
HC	SD: Utterance duration (Acoustic intensity)	0.00031576	413
HC	SD: Mid-frequency summed energy	0.000207045	414
HC	Min: Pause duration (broadband summed energy)	0.00036685	415
HC	CoV: Utterance duration (high-frequency summed energy)	0.000279661	416
HC	Min: Spectral slope	0.000418061	417
HC	Max: Mid-frequency summed energy	0.000390056	418
HC	Min: Pause duration (broadband summed energy)	0.000183167	419
HC	Range: Utterance duration (f0-range summed energy)	0.00021061	420
HC	Max: Speech rate (Spectral flux)	4.52815E-05	421
HC	Min: Pause duration (high-frequency summed energy)	0.000731497	422
HC	Min: Pause duration (Spectral flux)	0.000112256	423
HC	CoV: Pause duration (high-frequency summed energy)	2.80181E-05	424
HC	Max: Speech rate (Absolute amplitude)	0	425
HC	SD: Utterance duration (Absolute amplitude)	0	426
HC	CoV: Speech rate (broadband summed energy)	0	427
HC	Max: Utterance duration (high-frequency summed energy)	0	428
HC	Range: Pause duration (mid-frequency summed energy)	0	429
HC	Range: Speech rate (broadband summed energy)	0	430
HC	Range: Utterance duration (mid-frequency summed energy)	0	431
HC	Mean: Spectral slope	0	432
HC	Min: Spectral flux	0	433
HC	Min: Formant 5	0	434
HC	Min: Formant 4	0	435
HC	Min: Formant 3	0	436
HC	Min: Formant 2	0	437
HC	Min: Formant 1	0	438
HC	Min: Broadband frequency peak frequency	0	439
HC	Min: f0 peak frequency	0	440
HC	Min: High-frequency peak frequency	0	441
HC	Min: Mid-frequency peak frequency	0	442
HC	Min: Low-frequency peak frequency	0	443
HC	SD: Peak broadbansummed energy	0	444
MS	Min: Spectral decrease	0.594268532	1
MS	Min: f0 summed energy	0.073102504	2
MS	Min: High-frequency summed energy	0.132769105	3
MS	Min: Utterance duration (low-frequency summed energy)	0.071297606	4
MS	Max: Spectral decrease	0.029363761	5
MS	Mean: Utterance duration (broadband summed energy)	0.01818188	6
MS	Mean: Utterance duration (mid-frequency summed energy)	0.023505069	7
MS	Min: Low-frequency summed energy	0.064941548	8
MS	Mean: High-frequency summesummed energy	0.064409616	9
MS	Mean: Utterance duration (high-frequency summed energy)	0.021326534	10
MS	CoV: Inter-stress interval	0.033190316	11
MS	Range: Spectral decrease	0.248751198	12
MS	SD: Spectral crest	0.015763173	13
MS	Mean: Pause duration (mid-frequency summed energy)	0.022749232	14
MS	Min: Acoustic intensity (dB SPL)	0.102942358	15
MS	Range: Spectral crest	0.016796884	16
MS	Min: Mid-frequency summed energy	0.027229451	17
MS	CoV: Spectral crest	0.014560128	18
MS	Mean: Pause duration (f0-range summed energy)	0.011984318	19
MS	Mean: Low-frequency summed energy	0.026485731	20
MS	SD: Speech rate (mid-frequency summed energy)	0.014403933	21
MS	Min: Alpha ratio	0.019197463	22
MS	SD: Spectral entropy	0.013849327	23
MS	Mean: Utterance duration (f0-range summed energy)	0.019081517	24
MS	SD: Utterance duration (high-frequency summed energy)	0.008903399	25
MS	Min: Absolute amplitude	0.037606017	26
MS	Mean: Speech rate (high-frequency summed energy)	0.01212777	27
MS	Min: Spectral entropy	0.010119631	28
MS	Mean: Spectral decrease	0.250222469	29
MS	Max: Low-frequency summesummed energy	0.00897163	30
MS	Min: Peak broadbansummed energy	0.059262628	31
MS	Mean: Spectral centroid	0.009544289	32
MS	Max: Utterance duration (low-frequency summed energy)	0.00587139	33
MS	Max: Speech rate (mid-frequency summed energy)	0.01287037	34
MS	SD: Spectral spread	0.011205242	35
MS	CoV: Pause duration (f0-range summed energy)	0.061292812	36
MS	Mean: Speech rate (mid-frequency summed energy)	0.019110554	37
MS	SD: Utterance duration (mid-frequency summed energy)	0.007484353	38
MS	Max: Spectral spread	0.090691067	39
MS	SD: Pause duration (broadband summed energy)	0.008015208	40
MS	Max: Mid-frequency summesummed energy	0.018399636	41
MS	Min: Spectral crest	0.010015858	42
MS	Range: Low-frequency summesummed energy	0.154453971	43
MS	Min: Spectral centroid	0.039359073	44
MS	Max: Pause duration (mid-frequency summed energy)	0.003306956	45
MS	SD: Pause duration (low-frequency summed energy)	0.004836179	46
MS	Max: Spectral crest	0.00587911	47
MS	Range: Inter-stress interval	0.010470451	48
MS	CoV: Spectral kurtosis	0.015842165	49
MS	Mean: Formant 2	0.010539306	50
MS	SD: Pause duration (high-frequency summed energy)	0.010427856	51
MS	Range: Low-frequency summed energy	0.016526627	52
MS	Mean: Speech rate (f0-range summed energy)	0.010208811	53
MS	CoV: Utterance duration (Spectral flux)	0.003648093	54
MS	SD: Inter-stress interval	0.009896386	55
MS	Max: Formant 5	0.011659417	56
MS	Range: Spectral spread	0.052125059	57
MS	CoV: Spectral entropy	0.007409064	58
MS	Max: Low-frequency summed energy	0.010619528	59
MS	Max: Spectral flatness	0.016575111	60
MS	Mean: Spectral skewness	0.008301463	61
MS	CoV: Spectral skewness	0.009318562	62
MS	Range: Formant 5	0.00986233	63
MS	Min: Fundamental frequency	0.014800086	64
MS	Max: Utterance duration (f0-range summed energy)	0.008303437	65
MS	CoV: Formant 5	0.008026363	66
MS	Mean: Speech rate (low-frequency summed energy)	0.012158984	67
MS	Range: Spectral entropy	0.014813965	68
MS	SD: Speech rate (f0-range summed energy)	0.004375308	69
MS	SD: Speech rate (Absolute amplitude)	0.003488751	70
MS	Range: Speech rate (broadband summed energy)	0.009195298	71
MS	Max: Utterance duration (mid-frequency summed energy)	0.006496575	72
MS	Min: Utterance duration (f0-range summed energy)	0.01149613	73
MS	Max: Utterance duration (broadband summed energy)	0.004808521	74
MS	Range: Speech rate (high-frequency summed energy)	0.002856974	75
MS	CoV: Spectral spread	0.013956226	76
MS	Max: Pause duration (broadband summed energy)	0.008623514	77
MS	Range: Pause duration (Acoustic intensity)	0.009782734	78
MS	Max: Utterance duration (high-frequency summed energy)	0.00368569	79
MS	SD: Spectral decrease	0.109700501	80
MS	Mean: Utterance duration (Absolute amplitude)	0.010214809	81
MS	Mean: Speech rate (broadband summed energy)	0.004992887	82
MS	Mean: Spectral spread	0.017995105	83
MS	Range: Utterance duration (high-frequency summed energy)	0.004554188	84
MS	Mean: Utterance duration (Spectral flux)	0.006870703	85
MS	CoV: Spectral decrease	0.053394388	86
MS	Mean: Utterance duration (Acoustic intensity)	0.00943062	87
MS	CoV: Acoustic intensity (dB SPL)	0.011903061	88
MS	Max: Speech rate (f0-range summed energy)	0.01133976	89
MS	CoV: Formant 4	0.003921162	90
MS	SD: Utterance duration (f0-range summed energy)	0.005757814	91
MS	Range: Pause duration (mid-frequency summed energy)	0.005287086	92
MS	Max: Summed broadbansummed energy	0.008287303	93
MS	Max: Pause duration (high-frequency summed energy)	0.005038787	94
MS	Min: Summed broadbansummed energy	0.032987258	95
MS	Range: Pause duration (broadband summed energy)	0.006277831	96
MS	Range: Pause duration (f0-range summed energy)	0.008412033	97
MS	Max: f0 peak frequency	0.002864485	98
MS	Min: Mid-frequency summesummed energy	0.006944957	99
MS	Mean: Speech rate (high-frequency summed energy)	0.002937876	100
MS	Range: Speech rate (mid-frequency summed energy)	0.023315693	101
MS	Mean: Pause duration (low-frequency summed energy)	0.009547984	102
MS	Max: Formant 2	0.041590516	103
MS	Mean: Pause duration (high-frequency summed energy)	0.007268591	104
MS	CoV: Utterance duration (low-frequency summed energy)	0.009880268	105
MS	CoV: f0 summesummed energy	0.020766123	106
MS	SD: Utterance duration (low-frequency summed energy)	0.003517337	107
MS	Mean: Spectral flatness	0.007950551	108
MS	SD: Utterance duration (f0-range summed energy)	0.002559835	109
MS	Max: Spectral slope	0.043640837	110
MS	Max: Pause duration (f0-range summed energy)	0.007741384	111
MS	SD: Mid-frequency summesummed energy	0.014459504	112
MS	Max: Speech rate (f0-range summed energy)	0.00477049	113
MS	SD: Speech rate (high-frequency summed energy)	0.022563068	114
MS	SD: Pause duration (Acoustic intensity)	0.002754832	115
MS	Min: Utterance duration (low-frequency summed energy)	0.004991118	116
MS	Max: Acoustic intensity (dB SPL)	0.009165184	117
MS	CoV: Alpha ratio	0.008831408	118
MS	Range: Pause duration (broadband summed energy)	0.007043381	119
MS	Range: Spectral flatness	0.006811102	120
MS	Mean: Speech rate (Spectral flux)	0.003333888	121
MS	CoV: Pause duration (low-frequency summed energy)	0.001963797	122
MS	SD: Pause duration (mid-frequency summed energy)	0.003392242	123
MS	Max: Pause duration (f0-range summed energy)	0.010562964	124
MS	Max: Inter-stress interval	0.006970386	125
MS	Min: Spectral kurtosis	0.006169657	126
MS	SD: Formant 1	0.011928845	127
MS	Min: Utterance duration (f0-range summed energy)	0.007815883	128
MS	Range: Speech rate (low-frequency summed energy)	0.004194257	129
MS	Range: Speech rate (low-frequency summed energy)	0.005145819	130
MS	Mean: Pause duration (low-frequency summed energy)	0.002329315	131
MS	SD: Acoustic intensity (dB SPL)	0.011123276	132
MS	Min: High-frequency summesummed energy	0.029461032	133
MS	SD: Absolute amplitude	0.011927913	134
MS	Range: Pause duration (low-frequency summed energy)	0.003324513	135
MS	CoV: High-frequency summed energy	0.011471523	136
MS	Mean: Formant 5	0.007254252	137
MS	Mean: Utterance duration (low-frequency summed energy)	0.003874281	138
MS	Max: Speech rate (high-frequency summed energy)	0.00334686	139
MS	Max: Pause duration (low-frequency summed energy)	0.005048551	140
MS	Range: Spectral centroid	0.037233388	141
MS	Range: High-frequency summed energy	0.018243202	142
MS	SD: High-frequency summesummed energy	0.009354601	143
MS	Min: Low-frequency summesummed energy	0.033509608	144
MS	Min: Speech rate (Acoustic intensity)	0.004222905	145
MS	SD: Spectral flatness	0.004576366	146
MS	CoV: Utterance duration (Acoustic intensity)	0.001717314	147
MS	CoV: Spectral flux	0.034680921	148
MS	Mean: Alpha ratio	0.006011592	149
MS	Min: Pause duration (Acoustic intensity)	0.004511928	150
MS	Mean: Utterance duration (low-frequency summed energy)	0.004395748	151
MS	Mean: Speech rate (low-frequency summed energy)	0.002238685	152
MS	Mean: Pause duration (Spectral flux)	0.005601994	153
MS	CoV: High-frequency peak frequency	0.018181639	154
MS	Min: Speech rate (Absolute amplitude)	0.004378863	155
MS	Max: Formant 3	0.017971162	156
MS	Max: Formant 4	0.009646104	157
MS	SD: Pause duration (Spectral flux)	0.002644421	158
MS	Range: f0 peak frequency	0.005981112	159
MS	Range: Spectral kurtosis	0.009022248	160
MS	SD: Summed broadbansummed energy	0.007406955	161
MS	Min: Speech rate (high-frequency summed energy)	0.003272137	162
MS	Mean: Pause duration (broadband summed energy)	0.00806393	163
MS	Range: Utterance duration (broadband summed energy)	0.003321601	164
MS	Mean: Pause duration (mid-frequency summed energy)	0.003321382	165
MS	CoV: Low-frequency peak frequency	0.028502086	166
MS	Min: Speech rate (mid-frequency summed energy)	0.007586297	167
MS	Range: Summed broadbansummed energy	0.011016595	168
MS	Min: f0 summesummed energy	0.005313575	169
MS	SD: High-frequency summed energy	0.006006141	170
MS	Mean: Speech rate (broadband summed energy)	0.012263027	171
MS	SD: Speech rate (low-frequency summed energy)	0.004259671	172
MS	Mean: f0 summed energy	0.003834625	173
MS	SD: f0 peak frequency	0.004434691	174
MS	CoV: Utterance duration (f0-range summed energy)	0.003606598	175
MS	Mean: Utterance duration (high-frequency summed energy)	0.001894348	176
MS	Max: Low-frequency peak frequency	0.014432286	177
MS	CoV: High-frequency summesummed energy	0.007919917	178
MS	Min: Utterance duration (Absolute amplitude)	0.006096216	179
MS	SD: Broadband frequency peak frequency	0.003450188	180
MS	Range: Formant 3	0.015332681	181
MS	Max: Utterance duration (Acoustic intensity)	0.003579722	182
MS	Range: Formant 2	0.014997657	183
MS	SD: Utterance duration (broadband summed energy)	0.003839139	184
MS	SD: Pause duration (f0-range summed energy)	0.003658083	185
MS	CoV: f0 peak frequency	0.009437112	186
MS	Mean: Utterance duration (broadband summed energy)	0.008026947	187
MS	Mean: Pause duration (Absolute amplitude)	0.002070657	188
MS	Mean: Mid-frequency summesummed energy	0.005179205	189
MS	CoV: Speech rate (broadband summed energy)	0.002491961	190
MS	CoV: Utterance duration (high-frequency summed energy)	0.002047328	191
MS	Mean: Speech rate (Absolute amplitude)	0.005324371	192
MS	Mean: Formant 3	0.003855522	193
MS	Max: Spectral entropy	0.003712558	194
MS	CoV: Formant 2	0.005709309	195
MS	Range: Utterance duration (Spectral flux)	0.001957398	196
MS	CoV: Speech rate (Spectral flux)	0.002372872	197
MS	CoV: Speech rate (Acoustic intensity)	0.004843477	198
MS	SD: Spectral kurtosis	0.004201845	199
MS	Max: Speech rate (broadband summed energy)	0.003690804	200
MS	Range: Speech rate (f0-range summed energy)	0.009573862	201
MS	Min: Pause duration (f0-range summed energy)	0.002767406	202
MS	Mean: Speech rate (mid-frequency summed energy)	0.002225217	203
MS	Mean: Spectral entropy	0.003696452	204
MS	SD: Speech rate (Acoustic intensity)	0.00203593	205
MS	Max: Utterance duration (mid-frequency summed energy)	0.003574855	206
MS	SD: Utterance duration (low-frequency summed energy)	0.002047768	207
MS	Range: Pause duration (high-frequency summed energy)	0.001633212	208
MS	Max: f0 summed energy	0.003383639	209
MS	SD: Formant 3	0.009617026	210
MS	Mean: Formant 4	0.003713792	211
MS	Min: Pause duration (low-frequency summed energy)	0.00321321	212
MS	CoV: Pause duration (mid-frequency summed energy)	0.001998996	213
MS	Range: Peak broadbansummed energy	0.005327166	214
MS	SD: Low-frequency peak frequency	0.036193657	215
MS	Mean: Broadband frequency peak frequency	0.005732914	216
MS	Max: High-frequency summesummed energy	0.00602465	217
MS	Mean: Pause duration (broadband summed energy)	0.001821509	218
MS	Max: Speech rate (Acoustic intensity)	0.003180574	219
MS	Max: Speech rate (low-frequency summed energy)	0.002643123	220
MS	SD: Pause duration (f0-range summed energy)	0.002085651	221
MS	CoV: Speech rate (mid-frequency summed energy)	0.003204884	222
MS	SD: Alpha ratio	0.005916868	223
MS	Range: Fundamental frequency	0.003642527	224
MS	SD: Speech rate (high-frequency summed energy)	0.001028914	225
MS	Mean: Mid-frequency peak frequency	0.005234213	226
MS	CoV: Speech rate (low-frequency summed energy)	0.003266714	227
MS	Max: Spectral centroid	0.009107832	228
MS	SD: Utterance duration (broadband summed energy)	0.002007731	229
MS	CoV: Utterance duration (f0-range summed energy)	0.000944591	230
MS	SD: Speech rate (broadband summed energy)	0.002196876	231
MS	Min: Speech rate (mid-frequency summed energy)	0.005159069	232
MS	Max: Spectral kurtosis	0.003392049	233
MS	CoV: Formant 3	0.004579729	234
MS	CoV: Utterance duration (broadband summed energy)	0.006480611	235
MS	Max: Speech rate (high-frequency summed energy)	0.006018456	236
MS	Min: Pause duration (mid-frequency summed energy)	0.003976028	237
MS	Range: Utterance duration (low-frequency summed energy)	0.00358353	238
MS	Min: Utterance duration (high-frequency summed energy)	0.005166085	239
MS	SD: Formant 4	0.02188309	240
MS	Max: Speech rate (low-frequency summed energy)	0.003670193	241
MS	SD: Formant 2	0.023874592	242
MS	CoV: f0 summed energy	0.003636339	243
MS	SD: Fundamental frequency	0.008531262	244
MS	Max: Spectral flux	0.007957266	245
MS	Range: Pause duration (low-frequency summed energy)	0.001101763	246
MS	Range: Speech rate (Acoustic intensity)	0.002378327	247
MS	Max: Speech rate (broadband summed energy)	0.00274071	248
MS	SD: Pause duration (broadband summed energy)	0.003470717	249
MS	Range: Pause duration (Spectral flux)	0.005022743	250
MS	Max: Utterance duration (low-frequency summed energy)	0.002608966	251
MS	CoV: Speech rate (high-frequency summed energy)	0.004220082	252
MS	Mean: High-frequency summed energy	0.005439171	253
MS	Mean: Summed broadbansummed energy	0.008698306	254
MS	Max: Utterance duration (Absolute amplitude)	0.001455742	255
MS	Range: Speech rate (f0-range summed energy)	0.006111574	256
MS	Range: Alpha ratio	0.004167746	257
MS	Range: Mid-frequency peak frequency	0.006732556	258
MS	SD: Low-frequency summed energy	0.004608632	259
MS	Range: Utterance duration (high-frequency summed energy)	0.002507822	260
MS	CoV: Fundamental frequency	0.00654259	261
MS	Min: Spectral flatness	0.002095431	262
MS	Mean: f0 peak frequency	0.004441782	263
MS	SD: f0 summesummed energy	0.003880249	264
MS	Mean: Speech rate (f0-range summed energy)	0.009404544	265
MS	Range: Mid-frequency summesummed energy	0.001934959	266
MS	SD: Speech rate (broadband summed energy)	0.001321997	267
MS	Range: Speech rate (high-frequency summed energy)	0.001729486	268
MS	SD: Pause duration (mid-frequency summed energy)	0.002079615	269
MS	Mean: Pause duration (Acoustic intensity)	0.018195094	270
MS	Range: Utterance duration (Absolute amplitude)	0.002795479	271
MS	Max: High-frequency peak frequency	0.002347072	272
MS	Range: Spectral skewness	0.001545322	273
MS	Mean: Peak broadbansummed energy	0.001251643	274
MS	Min: Inter-stress interval	0.00573082	275
MS	SD: Mid-frequency peak frequency	0.003924097	276
MS	SD: Pause duration (Absolute amplitude)	0.004188926	277
MS	Mean: Spectral kurtosis	0.003444762	278
MS	Mean: Inter-stress interval	0.00699984	279
MS	CoV: Speech rate (f0-range summed energy)	0.002224542	280
MS	Max: Utterance duration (broadband summed energy)	0.002485112	281
MS	Min: Utterance duration (mid-frequency summed energy)	0.005502255	282
MS	Max: Spectral skewness	0.004171457	283
MS	Range: f0 summed energy	0.001659379	284
MS	Mean: Utterance duration (mid-frequency summed energy)	0.001979469	285
MS	SD: Utterance duration (mid-frequency summed energy)	0.008431882	286
MS	CoV: Utterance duration (low-frequency summed energy)	0.002894747	287
MS	Mean: Formant 1	0.001647993	288
MS	CoV: Spectral slope	0.023579387	289
MS	CoV: Pause duration (Spectral flux)	0.004436277	290
MS	Mean: Fundamental frequency	0.003248809	291
MS	Min: Utterance duration (broadband summed energy)	0.00460147	292
MS	CoV: Pause duration (f0-range summed energy)	0.002464775	293
MS	CoV: Pause duration (high-frequency summed energy)	0.003505617	294
MS	Max: Broadband frequency peak frequency	0.004056049	295
MS	SD: Utterance duration (high-frequency summed energy)	0.005958828	296
MS	Max: High-frequency summed energy	0.007450217	297
MS	CoV: Low-frequency summesummed energy	0.012950335	298
MS	Max: Fundamental frequency	0.006097115	299
MS	Min: Pause duration (f0-range summed energy)	0.002645198	300
MS	Max: Pause duration (low-frequency summed energy)	0.000990745	301
MS	Range: Speech rate (Absolute amplitude)	0.001370964	302
MS	Range: Pause duration (Absolute amplitude)	0.006324216	303
MS	SD: Pause duration (high-frequency summed energy)	0.001810268	304
MS	Min: Utterance duration (broadband summed energy)	0.003311168	305
MS	SD: High-frequency peak frequency	0.00239295	306
MS	SD: Low-frequency summesummed energy	0.004890237	307
MS	CoV: Speech rate (mid-frequency summed energy)	0.003086065	308
MS	Min: Speech rate (low-frequency summed energy)	0.003382767	309
MS	Range: Spectral slope	0.004864323	310
MS	Range: Mid-frequency summed energy	0.002762096	311
MS	Min: Utterance duration (Spectral flux)	0.003182273	312
MS	Mean: Absolute amplitude	0.01009017	313
MS	Range: Broadband frequency peak frequency	0.005850502	314
MS	Max: Pause duration (Absolute amplitude)	0.00120703	315
MS	Mean: Spectral flux	0.00381607	316
MS	Mean: Low-frequency peak frequency	0.004673201	317
MS	CoV: Broadband frequency peak frequency	0.001964931	318
MS	Mean: Utterance duration (f0-range summed energy)	0.001011718	319
MS	Max: Peak broadbansummed energy	0.001658771	320
MS	Range: f0 summesummed energy	0.001413748	321
MS	Max: Pause duration (high-frequency summed energy)	0.001726143	322
MS	Range: Speech rate (Spectral flux)	0.001633133	323
MS	CoV: Spectral flatness	0.002184098	324
MS	Max: Speech rate (mid-frequency summed energy)	0.002039816	325
MS	CoV: Mid-frequency summesummed energy	0.004721685	326
MS	Min: Speech rate (low-frequency summed energy)	0.000919541	327
MS	Max: Pause duration (mid-frequency summed energy)	0.002294036	328
MS	Range: High-frequency peak frequency	0.002552599	329
MS	CoV: Spectral centroid	0.004277792	330
MS	Mean: Low-frequency summesummed energy	0.013050594	331
MS	Range: Utterance duration (broadband summed energy)	0.002333442	332
MS	Mean: Mid-frequency summed energy	0.004013719	333
MS	SD: Speech rate (low-frequency summed energy)	0.001109796	334
MS	Range: Pause duration (high-frequency summed energy)	0.002296027	335
MS	CoV: Pause duration (broadband summed energy)	0.00264491	336
MS	Max: Formant 1	0.00549436	337
MS	CoV: Pause duration (Acoustic intensity)	0.001968821	338
MS	Min: Spectral skewness	0.005884827	339
MS	CoV: Mid-frequency peak frequency	0.001903169	340
MS	Range: Spectral flux	0.004203515	341
MS	Mean: Pause duration (high-frequency summed energy)	0.001003648	342
MS	CoV: Absolute amplitude	0.002103855	343
MS	Max: Alpha ratio	0.000569735	344
MS	SD: Speech rate (mid-frequency summed energy)	0.003266279	345
MS	Max: Utterance duration (Spectral flux)	0.006992893	346
MS	CoV: Utterance duration (mid-frequency summed energy)	0.00202107	347
MS	Min: Utterance duration (Acoustic intensity)	0.001632999	348
MS	CoV: Speech rate (f0-range summed energy)	0.002300095	349
MS	SD: Speech rate (f0-range summed energy)	0.00179905	350
MS	Range: Low-frequency peak frequency	0.0073143	351
MS	SD: Spectral slope	0.002162654	352
MS	Min: Speech rate (high-frequency summed energy)	0.004260877	353
MS	CoV: Summed broadbansummed energy	0.002332334	354
MS	Range: Absolute amplitude	0.000690465	355
MS	Mean: Pause duration (f0-range summed energy)	0.002011109	356
MS	Mean: Acoustic intensity (dB SPL)	0.00541954	357
MS	Range: High-frequency summesummed energy	0.00176411	358
MS	Max: Pause duration (broadband summed energy)	0.001282023	359
MS	Range: Formant 1	0.001116535	360
MS	Min: Speech rate (broadband summed energy)	0.002567309	361
MS	Range: Acoustic intensity (dB SPL)	0.001180434	362
MS	Mean: Speech rate (Acoustic intensity)	0.007662691	363
MS	CoV: Speech rate (high-frequency summed energy)	0.001172712	364
MS	CoV: Pause duration (Absolute amplitude)	0.001734942	365
MS	Min: Speech rate (f0-range summed energy)	0.003953636	366
MS	Min: Speech rate (f0-range summed energy)	0.003562119	367
MS	Range: Utterance duration (mid-frequency summed energy)	0.002912207	368
MS	SD: Spectral skewness	0.001560511	369
MS	Max: Pause duration (Spectral flux)	0.001600068	370
MS	Mean: Spectral crest	0.002526147	371
MS	Max: Pause duration (Acoustic intensity)	0.001049227	372
MS	Min: Speech rate (broadband summed energy)	0.000374501	373
MS	CoV: Utterance duration (broadband summed energy)	0.001941723	374
MS	Range: Utterance duration (Acoustic intensity)	0.001860903	375
MS	CoV: Utterance duration (Absolute amplitude)	0.001468878	376
MS	Range: Formant 4	0.000672666	377
MS	Range: Utterance duration (f0-range summed energy)	0.000957726	378
MS	Min: Pause duration (Absolute amplitude)	0.001553954	379
MS	CoV: Utterance duration (mid-frequency summed energy)	0.000453098	380
MS	Mean: f0 summesummed energy	0.001060701	381
MS	Max: Utterance duration (f0-range summed energy)	0.001830634	382
MS	SD: Formant 5	0.000840142	383
MS	Min: Spectral spread	0.000944933	384
MS	CoV: Speech rate (Absolute amplitude)	0.000879742	385
MS	Max: Mid-frequency peak frequency	0.002081984	386
MS	CoV: Mid-frequency summed energy	0.001178577	387
MS	Range: Pause duration (f0-range summed energy)	0.000236329	388
MS	Mean: High-frequency peak frequency	0.000861074	389
MS	Min: Pause duration (high-frequency summed energy)	0.000430127	390
MS	SD: Spectral centroid	0.002467033	391
MS	SD: Pause duration (low-frequency summed energy)	0.000554485	392
MS	CoV: Low-frequency summed energy	0.001745067	393
MS	CoV: Peak broadbansummed energy	0.000742897	394
MS	CoV: Pause duration (broadband summed energy)	0.000901802	395
MS	SD: Spectral flux	0.001293497	396
MS	Min: Pause duration (low-frequency summed energy)	0.000783145	397
MS	Min: Utterance duration (mid-frequency summed energy)	0.002302501	398
MS	SD: f0 summed energy	0.001160352	399
MS	SD: Utterance duration (Spectral flux)	0.00073258	400
MS	Min: Speech rate (Spectral flux)	0.000896849	401
MS	Range: Speech rate (mid-frequency summed energy)	0.000788831	402
MS	CoV: Pause duration (mid-frequency summed energy)	0.000527432	403
MS	Range: Utterance duration (low-frequency summed energy)	0.000501375	404
MS	Min: Pause duration (mid-frequency summed energy)	0.000674728	405
MS	CoV: Pause duration (low-frequency summed energy)	0.000491622	406
MS	Max: f0 summesummed energy	0.001226125	407
MS	CoV: Formant 1	0.001164497	408
MS	Min: Utterance duration (high-frequency summed energy)	0.000280797	409
MS	CoV: Speech rate (low-frequency summed energy)	0.000329072	410
MS	SD: Speech rate (Spectral flux)	0.000677712	411
MS	Max: Absolute amplitude	0.000841366	412
MS	SD: Utterance duration (Acoustic intensity)	0.000326259	413
MS	SD: Mid-frequency summed energy	0.000446597	414
MS	Min: Pause duration (broadband summed energy)	0.000353732	415
MS	CoV: Utterance duration (high-frequency summed energy)	0.000247635	416
MS	Min: Spectral slope	0.000538763	417
MS	Max: Mid-frequency summed energy	0.000511489	418
MS	Min: Pause duration (broadband summed energy)	0.000359315	419
MS	Range: Utterance duration (f0-range summed energy)	0.000152748	420
MS	Max: Speech rate (Spectral flux)	0.00017049	421
MS	Min: Pause duration (high-frequency summed energy)	0.000642723	422
MS	Min: Pause duration (Spectral flux)	7.38419E-05	423
MS	CoV: Pause duration (high-frequency summed energy)	6.0655E-05	424
MS	Max: Speech rate (Absolute amplitude)	0	425
MS	SD: Utterance duration (Absolute amplitude)	0	426
MS	CoV: Speech rate (broadband summed energy)	0	427
MS	Max: Utterance duration (high-frequency summed energy)	0	428
MS	Range: Pause duration (mid-frequency summed energy)	0	429
MS	Range: Speech rate (broadband summed energy)	0	430
MS	Range: Utterance duration (mid-frequency summed energy)	0	431
MS	Mean: Spectral slope	0	432
MS	Min: Spectral flux	0	433
MS	Min: Formant 5	0	434
MS	Min: Formant 4	0	435
MS	Min: Formant 3	0	436
MS	Min: Formant 2	0	437
MS	Min: Formant 1	0	438
MS	Min: Broadband frequency peak frequency	0	439
MS	Min: f0 peak frequency	0	440
MS	Min: High-frequency peak frequency	0	441
MS	Min: Mid-frequency peak frequency	0	442
MS	Min: Low-frequency peak frequency	0	443
MS	SD: Peak broadbansummed energy	0	444
Overall	Min: Spectral decrease	0.396362922	1
Overall	Mean: Spectral decrease	0.183652194	2
Overall	Range: Spectral decrease	0.166204863	3
Overall	Range: Low-frequency summesummed energy	0.104269374	4
Overall	Min: High-frequency summed energy	0.090987345	5
Overall	SD: Spectral decrease	0.078956406	6
Overall	Max: Spectral spread	0.077916948	7
Overall	Min: Low-frequency summed energy	0.073963956	8
Overall	Min: Acoustic intensity (dB SPL)	0.068720327	9
Overall	Min: f0 summed energy	0.061582846	10
Overall	Min: Peak broadbansummed energy	0.056077832	11
Overall	Min: Utterance duration (low-frequency summed energy)	0.054200125	12
Overall	Range: Spectral spread	0.047470344	13
Overall	Mean: High-frequency summesummed energy	0.04406733	14
Overall	CoV: Spectral decrease	0.0426954	15
Overall	Max: Spectral decrease	0.041307257	16
Overall	CoV: Pause duration (f0-range summed energy)	0.040878611	17
Overall	SD: Spectral crest	0.039686699	18
Overall	Mean: Utterance duration (broadband summed energy)	0.037862723	19
Overall	Mean: Utterance duration (mid-frequency summed energy)	0.03758337	20
Overall	Min: Spectral centroid	0.036246117	21
Overall	Mean: Utterance duration (high-frequency summed energy)	0.034775157	22
Overall	Min: Alpha ratio	0.03470595	23
Overall	Max: Spectral slope	0.034626909	24
Overall	CoV: Spectral crest	0.033880087	25
Overall	Max: Formant 2	0.032866087	26
Overall	CoV: Inter-stress interval	0.032440096	27
Overall	Mean: Pause duration (mid-frequency summed energy)	0.031897534	28
Overall	SD: Speech rate (mid-frequency summed energy)	0.030866929	29
Overall	Range: Spectral centroid	0.030706065	30
Overall	SD: Spectral entropy	0.030334689	31
Overall	Mean: Utterance duration (f0-range summed energy)	0.029850724	32
Overall	Min: Mid-frequency summed energy	0.029838705	33
Overall	Range: Spectral crest	0.029165191	34
Overall	Min: Summed broadbansummed energy	0.028535669	35
Overall	Mean: Speech rate (mid-frequency summed energy)	0.02650115	36
Overall	Min: Absolute amplitude	0.026478223	37
Overall	Mean: Pause duration (f0-range summed energy)	0.026353855	38
Overall	Max: Speech rate (mid-frequency summed energy)	0.026067198	39
Overall	Mean: Low-frequency summed energy	0.025475789	40
Overall	Min: High-frequency summesummed energy	0.025471846	41
Overall	SD: Utterance duration (high-frequency summed energy)	0.024952366	42
Overall	SD: Low-frequency peak frequency	0.024855599	43
Overall	CoV: Spectral flux	0.024535675	44
Overall	Range: Speech rate (mid-frequency summed energy)	0.023565726	45
Overall	Min: Spectral entropy	0.023488363	46
Overall	CoV: Spectral kurtosis	0.023451119	47
Overall	Min: Low-frequency summesummed energy	0.023381655	48
Overall	Mean: Spectral centroid	0.023042712	49
Overall	Mean: Speech rate (high-frequency summed energy)	0.02195417	50
Overall	Max: Utterance duration (low-frequency summed energy)	0.021858475	51
Overall	SD: Speech rate (high-frequency summed energy)	0.02177341	52
Overall	CoV: f0 summesummed energy	0.021736885	53
Overall	Mean: Spectral spread	0.021632006	54
Overall	Max: Spectral flatness	0.021626211	55
Overall	Range: Inter-stress interval	0.021348405	56
Overall	SD: Pause duration (broadband summed energy)	0.021295028	57
Overall	CoV: Low-frequency peak frequency	0.021099616	58
Overall	Max: Low-frequency summesummed energy	0.020938497	59
Overall	SD: Utterance duration (mid-frequency summed energy)	0.020617751	60
Overall	Mean: Formant 2	0.020371986	61
Overall	SD: Spectral spread	0.01979445	62
Overall	Max: Mid-frequency summesummed energy	0.017627629	63
Overall	CoV: Spectral slope	0.017495161	64
Overall	Range: Speech rate (broadband summed energy)	0.016949951	65
Overall	SD: Formant 2	0.016893392	66
Overall	Min: Spectral crest	0.016736784	67
Overall	Range: Pause duration (Acoustic intensity)	0.016617208	68
Overall	Max: Speech rate (f0-range summed energy)	0.016537435	69
Overall	Max: Pause duration (mid-frequency summed energy)	0.016529317	70
Overall	Max: Utterance duration (f0-range summed energy)	0.016326686	71
Overall	Mean: Utterance duration (Absolute amplitude)	0.016174511	72
Overall	Max: Spectral crest	0.015995415	73
Overall	Max: Pause duration (broadband summed energy)	0.015852593	74
Overall	CoV: Formant 5	0.015771117	75
Overall	SD: Formant 4	0.015626534	76
Overall	CoV: Acoustic intensity (dB SPL)	0.015416175	77
Overall	CoV: Spectral entropy	0.01537221	78
Overall	SD: Pause duration (low-frequency summed energy)	0.015242639	79
Overall	Mean: Utterance duration (Acoustic intensity)	0.015155084	80
Overall	CoV: Utterance duration (Spectral flux)	0.014605804	81
Overall	Range: Low-frequency summed energy	0.014562811	82
Overall	Min: Utterance duration (f0-range summed energy)	0.014484118	83
Overall	Mean: Speech rate (f0-range summed energy)	0.014461516	84
Overall	SD: Formant 1	0.014272907	85
Overall	Max: Low-frequency peak frequency	0.013981966	86
Overall	Range: Pause duration (f0-range summed energy)	0.013924403	87
Overall	Max: Pause duration (f0-range summed energy)	0.013917387	88
Overall	SD: Pause duration (high-frequency summed energy)	0.013694484	89
Overall	SD: Inter-stress interval	0.013679263	90
Overall	Min: Fundamental frequency	0.013551755	91
Overall	CoV: High-frequency peak frequency	0.013537326	92
Overall	CoV: Utterance duration (low-frequency summed energy)	0.013399855	93
Overall	Mean: Spectral skewness	0.013339287	94
Overall	Max: Utterance duration (mid-frequency summed energy)	0.013290743	95
Overall	Mean: Pause duration (Acoustic intensity)	0.013167729	96
Overall	Max: Utterance duration (broadband summed energy)	0.013146201	97
Overall	Max: Low-frequency summed energy	0.013063866	98
Overall	Max: Formant 5	0.013043501	99
Overall	Max: Formant 3	0.013017476	100
Overall	Range: Spectral entropy	0.012957184	101
Overall	Range: Pause duration (broadband summed energy)	0.012855155	102
Overall	CoV: Spectral skewness	0.012758245	103
Overall	Mean: Pause duration (low-frequency summed energy)	0.012724181	104
Overall	Max: Pause duration (f0-range summed energy)	0.012636909	105
Overall	Range: High-frequency summed energy	0.012621995	106
Overall	Range: Formant 2	0.012543168	107
Overall	Range: Utterance duration (high-frequency summed energy)	0.012461591	108
Overall	Range: Pause duration (mid-frequency summed energy)	0.012286865	109
Overall	Range: Formant 5	0.011913932	110
Overall	CoV: Formant 4	0.011699356	111
Overall	Mean: Speech rate (broadband summed energy)	0.011697673	112
Overall	Mean: Speech rate (low-frequency summed energy)	0.011539477	113
Overall	SD: Speech rate (f0-range summed energy)	0.011382131	114
Overall	Range: Formant 3	0.011280512	115
Overall	SD: Speech rate (Absolute amplitude)	0.011278746	116
Overall	CoV: Spectral spread	0.011274616	117
Overall	Max: Utterance duration (high-frequency summed energy)	0.01114111	118
Overall	Range: Speech rate (high-frequency summed energy)	0.011114023	119
Overall	SD: Acoustic intensity (dB SPL)	0.010863833	120
Overall	Range: Pause duration (broadband summed energy)	0.010775719	121
Overall	SD: Mid-frequency summesummed energy	0.010680421	122
Overall	Range: Spectral flatness	0.010421956	123
Overall	Mean: Speech rate (broadband summed energy)	0.010327749	124
Overall	SD: Utterance duration (f0-range summed energy)	0.010236049	125
Overall	Max: Inter-stress interval	0.010096491	126
Overall	Mean: Utterance duration (Spectral flux)	0.010022946	127
Overall	Mean: Pause duration (broadband summed energy)	0.009864552	128
Overall	Mean: Formant 5	0.009761526	129
Overall	CoV: f0 peak frequency	0.009733357	130
Overall	Max: Pause duration (low-frequency summed energy)	0.009439028	131
Overall	Max: Pause duration (high-frequency summed energy)	0.009420706	132
Overall	Min: Mid-frequency summesummed energy	0.009377141	133
Overall	Max: Summed broadbansummed energy	0.00937575	134
Overall	Mean: Low-frequency summesummed energy	0.009327945	135
Overall	Max: Spectral centroid	0.009226794	136
Overall	Mean: Alpha ratio	0.009213775	137
Overall	SD: Utterance duration (low-frequency summed energy)	0.00917455	138
Overall	Range: Speech rate (low-frequency summed energy)	0.009164904	139
Overall	CoV: Low-frequency summesummed energy	0.00898668	140
Overall	CoV: High-frequency summed energy	0.008978151	141
Overall	Max: f0 peak frequency	0.008977293	142
Overall	Mean: Speech rate (high-frequency summed energy)	0.008953901	143
Overall	SD: Utterance duration (f0-range summed energy)	0.008798919	144
Overall	Range: Speech rate (f0-range summed energy)	0.008747041	145
Overall	Max: Formant 4	0.008732326	146
Overall	Min: Utterance duration (f0-range summed energy)	0.008707113	147
Overall	SD: Pause duration (mid-frequency summed energy)	0.008592778	148
Overall	Mean: Utterance duration (broadband summed energy)	0.008539565	149
Overall	SD: Absolute amplitude	0.008411617	150
Overall	Min: Utterance duration (low-frequency summed energy)	0.008374336	151
Overall	Mean: Pause duration (Spectral flux)	0.008286364	152
Overall	SD: Pause duration (Acoustic intensity)	0.008265887	153
Overall	Mean: Spectral flatness	0.00825501	154
Overall	Mean: Pause duration (high-frequency summed energy)	0.008212535	155
Overall	CoV: Alpha ratio	0.008101676	156
Overall	Max: Speech rate (f0-range summed energy)	0.00807542	157
Overall	Max: Acoustic intensity (dB SPL)	0.008037527	158
Overall	Mean: Summed broadbansummed energy	0.00778564	159
Overall	Range: Summed broadbansummed energy	0.00772465	160
Overall	SD: High-frequency summesummed energy	0.007704177	161
Overall	CoV: Formant 2	0.007496177	162
Overall	Range: f0 peak frequency	0.007465762	163
Overall	Min: Spectral kurtosis	0.007405384	164
Overall	CoV: Pause duration (low-frequency summed energy)	0.007356359	165
Overall	Mean: Speech rate (Spectral flux)	0.007335736	166
Overall	Mean: Speech rate (f0-range summed energy)	0.007309716	167
Overall	Mean: Speech rate (Absolute amplitude)	0.007250184	168
Overall	Mean: Pause duration (low-frequency summed energy)	0.007202967	169
Overall	Mean: Utterance duration (low-frequency summed energy)	0.00711722	170
Overall	SD: Utterance duration (mid-frequency summed energy)	0.007066438	171
Overall	SD: Formant 3	0.006985084	172
Overall	SD: Speech rate (low-frequency summed energy)	0.006937827	173
Overall	Mean: Utterance duration (low-frequency summed energy)	0.006917361	174
Overall	Min: Speech rate (mid-frequency summed energy)	0.006841469	175
Overall	SD: Fundamental frequency	0.006795973	176
Overall	Range: Mid-frequency peak frequency	0.006786648	177
Overall	Mean: Absolute amplitude	0.006761104	178
Overall	Range: Pause duration (low-frequency summed energy)	0.006745231	179
Overall	Range: Speech rate (low-frequency summed energy)	0.006669525	180
Overall	SD: Pause duration (Spectral flux)	0.006580721	181
Overall	CoV: Utterance duration (Acoustic intensity)	0.006558571	182
Overall	Max: Speech rate (high-frequency summed energy)	0.006547405	183
Overall	SD: Spectral flatness	0.006487589	184
Overall	Range: Spectral kurtosis	0.006460204	185
Overall	Range: Speech rate (f0-range summed energy)	0.006458489	186
Overall	Mean: Mid-frequency summesummed energy	0.006448596	187
Overall	SD: Summed broadbansummed energy	0.00640389	188
Overall	Min: Speech rate (Acoustic intensity)	0.006354995	189
Overall	Mean: Formant 3	0.00620179	190
Overall	Max: Spectral flux	0.006171349	191
Overall	CoV: High-frequency summesummed energy	0.006092987	192
Overall	SD: Alpha ratio	0.006088059	193
Overall	Mean: Speech rate (low-frequency summed energy)	0.006079774	194
Overall	Max: Speech rate (high-frequency summed energy)	0.006077818	195
Overall	Range: Pause duration (Spectral flux)	0.005972945	196
Overall	Min: f0 summesummed energy	0.005965005	197
Overall	Min: Speech rate (Absolute amplitude)	0.005933939	198
Overall	SD: High-frequency summed energy	0.005909277	199
Overall	Mean: Speech rate (Acoustic intensity)	0.005873501	200
Overall	Max: Speech rate (broadband summed energy)	0.005868059	201
Overall	Mean: Formant 4	0.005838505	202
Overall	SD: Utterance duration (high-frequency summed energy)	0.005769554	203
Overall	Mean: Pause duration (mid-frequency summed energy)	0.005760072	204
Overall	CoV: Fundamental frequency	0.005749201	205
Overall	Mean: f0 summed energy	0.005745914	206
Overall	Range: Utterance duration (broadband summed energy)	0.005672521	207
Overall	Min: Utterance duration (mid-frequency summed energy)	0.005590338	208
Overall	Mean: Spectral entropy	0.005587463	209
Overall	Mean: Mid-frequency peak frequency	0.005573088	210
Overall	Min: Pause duration (Acoustic intensity)	0.005568237	211
Overall	Min: Speech rate (high-frequency summed energy)	0.005553662	212
Overall	Range: Low-frequency peak frequency	0.005533194	213
Overall	CoV: Formant 3	0.005527036	214
Overall	SD: f0 peak frequency	0.005456822	215
Overall	Min: Utterance duration (high-frequency summed energy)	0.005447828	216
Overall	Mean: Inter-stress interval	0.005375435	217
Overall	Min: Utterance duration (Absolute amplitude)	0.005372409	218
Overall	Max: Utterance duration (Acoustic intensity)	0.005349131	219
Overall	CoV: f0 summed energy	0.005319972	220
Overall	Range: Pause duration (Absolute amplitude)	0.005313704	221
Overall	CoV: Utterance duration (f0-range summed energy)	0.005276852	222
Overall	Max: Speech rate (low-frequency summed energy)	0.00526751	223
Overall	CoV: Speech rate (mid-frequency summed energy)	0.005244704	224
Overall	Max: Speech rate (Acoustic intensity)	0.005238432	225
Overall	SD: Broadband frequency peak frequency	0.005222313	226
Overall	Max: High-frequency summed energy	0.005201318	227
Overall	Range: Utterance duration (low-frequency summed energy)	0.005195782	228
Overall	Mean: Broadband frequency peak frequency	0.005188217	229
Overall	SD: Pause duration (f0-range summed energy)	0.00512083	230
Overall	Mean: Utterance duration (high-frequency summed energy)	0.005072523	231
Overall	Max: Utterance duration (Spectral flux)	0.005055827	232
Overall	Max: High-frequency summesummed energy	0.005011236	233
Overall	Mean: Pause duration (Absolute amplitude)	0.004867054	234
Overall	CoV: Speech rate (broadband summed energy)	0.004780132	235
Overall	Max: Spectral entropy	0.00474921	236
Overall	Range: Utterance duration (Spectral flux)	0.004747378	237
Overall	Range: Peak broadbansummed energy	0.004722609	238
Overall	Mean: High-frequency summed energy	0.004697149	239
Overall	CoV: Utterance duration (broadband summed energy)	0.004689325	240
Overall	Max: Utterance duration (mid-frequency summed energy)	0.004685512	241
Overall	CoV: Speech rate (Acoustic intensity)	0.004665927	242
Overall	CoV: Utterance duration (high-frequency summed energy)	0.004637642	243
Overall	Max: Speech rate (broadband summed energy)	0.004626935	244
Overall	Min: Spectral skewness	0.004598686	245
Overall	SD: Pause duration (Absolute amplitude)	0.004560367	246
Overall	Min: Inter-stress interval	0.004556085	247
Overall	Min: Speech rate (mid-frequency summed energy)	0.004539742	248
Overall	Max: Fundamental frequency	0.004537409	249
Overall	SD: Low-frequency summesummed energy	0.004532963	250
Overall	CoV: Speech rate (Spectral flux)	0.004526557	251
Overall	Max: Spectral kurtosis	0.004522437	252
Overall	Range: Fundamental frequency	0.004518856	253
Overall	Mean: Acoustic intensity (dB SPL)	0.004509964	254
Overall	CoV: Pause duration (mid-frequency summed energy)	0.004498404	255
Overall	SD: Utterance duration (broadband summed energy)	0.00448952	256
Overall	CoV: Speech rate (high-frequency summed energy)	0.004371017	257
Overall	Max: Broadband frequency peak frequency	0.004359137	258
Overall	Max: Formant 1	0.004286723	259
Overall	SD: Speech rate (broadband summed energy)	0.00426346	260
Overall	Mean: f0 peak frequency	0.004253572	261
Overall	Mean: Low-frequency peak frequency	0.004232583	262
Overall	Range: Broadband frequency peak frequency	0.004199131	263
Overall	Max: Speech rate (low-frequency summed energy)	0.004141426	264
Overall	SD: Pause duration (broadband summed energy)	0.004124647	265
Overall	Max: Utterance duration (low-frequency summed energy)	0.00408743	266
Overall	SD: Spectral kurtosis	0.004054869	267
Overall	CoV: Pause duration (Spectral flux)	0.004047899	268
Overall	Mean: Spectral kurtosis	0.004032779	269
Overall	Min: Pause duration (f0-range summed energy)	0.003940543	270
Overall	Min: Pause duration (low-frequency summed energy)	0.003917096	271
Overall	SD: Utterance duration (low-frequency summed energy)	0.003859815	272
Overall	Max: Spectral skewness	0.003856228	273
Overall	Range: Speech rate (Acoustic intensity)	0.003819032	274
Overall	Range: Pause duration (high-frequency summed energy)	0.00375823	275
Overall	Min: Pause duration (mid-frequency summed energy)	0.003728494	276
Overall	Max: f0 summed energy	0.003726689	277
Overall	Mean: Speech rate (mid-frequency summed energy)	0.003724579	278
Overall	SD: Pause duration (f0-range summed energy)	0.003723327	279
Overall	Range: Alpha ratio	0.00369302	280
Overall	SD: Speech rate (Acoustic intensity)	0.003691923	281
Overall	SD: f0 summesummed energy	0.003647633	282
Overall	Range: Spectral slope	0.003624151	283
Overall	CoV: Speech rate (low-frequency summed energy)	0.003594624	284
Overall	CoV: Mid-frequency summesummed energy	0.003551686	285
Overall	SD: Utterance duration (broadband summed energy)	0.003548553	286
Overall	Min: Utterance duration (broadband summed energy)	0.003535541	287
Overall	Min: Speech rate (high-frequency summed energy)	0.003493296	288
Overall	SD: Speech rate (high-frequency summed energy)	0.003485839	289
Overall	Range: Mid-frequency summesummed energy	0.003476605	290
Overall	SD: Low-frequency summed energy	0.003434848	291
Overall	CoV: Utterance duration (f0-range summed energy)	0.003421793	292
Overall	Min: Speech rate (low-frequency summed energy)	0.00340614	293
Overall	CoV: Spectral centroid	0.003366719	294
Overall	Mean: Pause duration (broadband summed energy)	0.00335969	295
Overall	Mean: Fundamental frequency	0.003264566	296
Overall	Range: Speech rate (high-frequency summed energy)	0.003222728	297
Overall	Min: Speech rate (f0-range summed energy)	0.003190065	298
Overall	Mean: Mid-frequency summed energy	0.003144182	299
Overall	Range: Utterance duration (Absolute amplitude)	0.003136199	300
Overall	Max: Utterance duration (Absolute amplitude)	0.003128981	301
Overall	Range: Pause duration (low-frequency summed energy)	0.003071857	302
Overall	Range: Spectral flux	0.003057941	303
Overall	Min: Utterance duration (Spectral flux)	0.003057261	304
Overall	SD: Mid-frequency peak frequency	0.003042304	305
Overall	SD: Pause duration (mid-frequency summed energy)	0.002965194	306
Overall	Mean: Spectral flux	0.002932655	307
Overall	Mean: Formant 1	0.002929911	308
Overall	CoV: Utterance duration (low-frequency summed energy)	0.002895053	309
Overall	SD: Speech rate (broadband summed energy)	0.002861367	310
Overall	CoV: Speech rate (f0-range summed energy)	0.002836773	311
Overall	Min: Speech rate (f0-range summed energy)	0.002832098	312
Overall	Mean: Utterance duration (mid-frequency summed energy)	0.002812741	313
Overall	Max: Utterance duration (broadband summed energy)	0.00279485	314
Overall	Min: Spectral flatness	0.002773912	315
Overall	Range: Mid-frequency summed energy	0.002769956	316
Overall	CoV: Speech rate (mid-frequency summed energy)	0.002752305	317
Overall	Range: Utterance duration (high-frequency summed energy)	0.002725752	318
Overall	Range: Spectral skewness	0.002658167	319
Overall	Mean: Peak broadbansummed energy	0.002652381	320
Overall	CoV: Pause duration (broadband summed energy)	0.002616858	321
Overall	SD: Pause duration (high-frequency summed energy)	0.00259988	322
Overall	Max: High-frequency peak frequency	0.002587229	323
Overall	Min: Utterance duration (broadband summed energy)	0.002583929	324
Overall	CoV: Pause duration (high-frequency summed energy)	0.0025465	325
Overall	CoV: Spectral flatness	0.002526004	326
Overall	Min: Pause duration (f0-range summed energy)	0.002483073	327
Overall	CoV: Broadband frequency peak frequency	0.002464152	328
Overall	Min: Speech rate (broadband summed energy)	0.002420191	329
Overall	CoV: Pause duration (f0-range summed energy)	0.002340154	330
Overall	SD: Speech rate (mid-frequency summed energy)	0.002328385	331
Overall	SD: High-frequency peak frequency	0.002317665	332
Overall	CoV: Summed broadbansummed energy	0.00226995	333
Overall	Range: f0 summed energy	0.002259717	334
Overall	Max: Pause duration (low-frequency summed energy)	0.002252589	335
Overall	CoV: Speech rate (f0-range summed energy)	0.002251312	336
Overall	Range: Utterance duration (mid-frequency summed energy)	0.002232488	337
Overall	CoV: Absolute amplitude	0.002172058	338
Overall	Range: Pause duration (high-frequency summed energy)	0.002118922	339
Overall	Max: Pause duration (Absolute amplitude)	0.002111425	340
Overall	Mean: Spectral crest	0.002068913	341
Overall	Range: f0 summesummed energy	0.002014583	342
Overall	Max: Speech rate (mid-frequency summed energy)	0.00198829	343
Overall	Range: Speech rate (Absolute amplitude)	0.001973549	344
Overall	Range: High-frequency peak frequency	0.001948277	345
Overall	Mean: Pause duration (f0-range summed energy)	0.001930947	346
Overall	Range: Utterance duration (broadband summed energy)	0.001918291	347
Overall	SD: Spectral centroid	0.001916185	348
Overall	Max: Pause duration (mid-frequency summed energy)	0.001895591	349
Overall	SD: Spectral slope	0.001891908	350
Overall	Min: Speech rate (low-frequency summed energy)	0.001882735	351
Overall	Max: Pause duration (high-frequency summed energy)	0.001847961	352
Overall	SD: Speech rate (f0-range summed energy)	0.00182677	353
Overall	Mean: Utterance duration (f0-range summed energy)	0.001815621	354
Overall	Min: Utterance duration (Acoustic intensity)	0.001745676	355
Overall	Mean: Pause duration (high-frequency summed energy)	0.001733238	356
Overall	CoV: Mid-frequency peak frequency	0.001721023	357
Overall	Range: Utterance duration (Acoustic intensity)	0.001693296	358
Overall	Range: Speech rate (Spectral flux)	0.001692445	359
Overall	SD: Spectral skewness	0.001641592	360
Overall	Range: High-frequency summesummed energy	0.001638926	361
Overall	Min: Utterance duration (mid-frequency summed energy)	0.001615651	362
Overall	Max: Utterance duration (f0-range summed energy)	0.001590024	363
Overall	CoV: Pause duration (Acoustic intensity)	0.001529244	364
Overall	Max: Peak broadbansummed energy	0.001523851	365
Overall	Max: Mid-frequency peak frequency	0.001503205	366
Overall	CoV: Utterance duration (mid-frequency summed energy)	0.001494025	367
Overall	Range: Formant 1	0.001488388	368
Overall	Max: Pause duration (broadband summed energy)	0.001470457	369
Overall	Min: Pause duration (Absolute amplitude)	0.001436478	370
Overall	Max: Pause duration (Acoustic intensity)	0.001399034	371
Overall	Range: Absolute amplitude	0.001396909	372
Overall	CoV: Pause duration (Absolute amplitude)	0.00139595	373
Overall	Max: Pause duration (Spectral flux)	0.001382741	374
Overall	CoV: Low-frequency summed energy	0.001366126	375
Overall	Range: Acoustic intensity (dB SPL)	0.00131361	376
Overall	CoV: Utterance duration (broadband summed energy)	0.001300371	377
Overall	SD: Speech rate (low-frequency summed energy)	0.001298867	378
Overall	Range: Utterance duration (f0-range summed energy)	0.001271386	379
Overall	CoV: Speech rate (high-frequency summed energy)	0.001252424	380
Overall	Max: Alpha ratio	0.001206809	381
Overall	CoV: Mid-frequency summed energy	0.001080984	382
Overall	CoV: Pause duration (broadband summed energy)	0.001029845	383
Overall	CoV: Utterance duration (Absolute amplitude)	0.001011581	384
Overall	Mean: High-frequency peak frequency	0.001002426	385
Overall	SD: Spectral flux	0.001000187	386
Overall	Mean: f0 summesummed energy	0.000959133	387
Overall	Max: f0 summesummed energy	0.000908922	388
Overall	SD: Pause duration (low-frequency summed energy)	0.000873839	389
Overall	SD: Formant 5	0.000871922	390
Overall	CoV: Peak broadbansummed energy	0.000855004	391
Overall	Min: Spectral spread	0.000850928	392
Overall	CoV: Formant 1	0.000833789	393
Overall	SD: f0 summed energy	0.000826635	394
Overall	CoV: Speech rate (Absolute amplitude)	0.000762214	395
Overall	Range: Formant 4	0.000756586	396
Overall	Min: Speech rate (broadband summed energy)	0.000755436	397
Overall	CoV: Utterance duration (mid-frequency summed energy)	0.00074281	398
Overall	Min: Pause duration (mid-frequency summed energy)	0.000737755	399
Overall	Min: Pause duration (low-frequency summed energy)	0.00073142	400
Overall	Range: Speech rate (mid-frequency summed energy)	0.00069506	401
Overall	Min: Pause duration (high-frequency summed energy)	0.000687929	402
Overall	SD: Utterance duration (Spectral flux)	0.000651836	403
Overall	Range: Pause duration (f0-range summed energy)	0.000634597	404
Overall	SD: Speech rate (Spectral flux)	0.000616076	405
Overall	Min: Speech rate (Spectral flux)	0.000605526	406
Overall	Range: Utterance duration (low-frequency summed energy)	0.00058462	407
Overall	Max: Absolute amplitude	0.000582465	408
Overall	Min: Pause duration (high-frequency summed energy)	0.000517503	409
Overall	CoV: Pause duration (low-frequency summed energy)	0.000497309	410
Overall	CoV: Pause duration (mid-frequency summed energy)	0.000470036	411
Overall	Min: Utterance duration (high-frequency summed energy)	0.000430154	412
Overall	CoV: Speech rate (low-frequency summed energy)	0.000406919	413
Overall	Min: Spectral slope	0.000399202	414
Overall	Max: Mid-frequency summed energy	0.000380675	415
Overall	Min: Pause duration (broadband summed energy)	0.00033263	416
Overall	SD: Mid-frequency summed energy	0.000315622	417
Overall	SD: Utterance duration (Acoustic intensity)	0.000315169	418
Overall	CoV: Utterance duration (high-frequency summed energy)	0.000263111	419
Overall	Min: Pause duration (broadband summed energy)	0.00025511	420
Overall	Range: Utterance duration (f0-range summed energy)	0.000192266	421
Overall	Max: Speech rate (Spectral flux)	0.000132089	422
Overall	Min: Pause duration (Spectral flux)	9.13437E-05	423
Overall	CoV: Pause duration (high-frequency summed energy)	4.49658E-05	424
Overall	Max: Speech rate (Absolute amplitude)	0	425
Overall	SD: Utterance duration (Absolute amplitude)	0	426
Overall	CoV: Speech rate (broadband summed energy)	0	427
Overall	Max: Utterance duration (high-frequency summed energy)	0	428
Overall	Range: Pause duration (mid-frequency summed energy)	0	429
Overall	Range: Speech rate (broadband summed energy)	0	430
Overall	Range: Utterance duration (mid-frequency summed energy)	0	431
Overall	Mean: Spectral slope	0	432
Overall	Min: Spectral flux	0	433
Overall	Min: Formant 5	0	434
Overall	Min: Formant 4	0	435
Overall	Min: Formant 3	0	436
Overall	Min: Formant 2	0	437
Overall	Min: Formant 1	0	438
Overall	Min: Broadband frequency peak frequency	0	439
Overall	Min: f0 peak frequency	0	440
Overall	Min: High-frequency peak frequency	0	441
Overall	Min: Mid-frequency peak frequency	0	442
Overall	Min: Low-frequency peak frequency	0	443
Overall	SD: Peak broadbansummed energy	0	444
